# Supplementary material for: Efficacy of mecobalamin (vitamin B12) in the treatment of long-term pain in women diagnosed with fibromyalgia: protocol for a randomised, placebo-controlled trial
Source: PubMed Central journal article supplement (PMC10069488; doi:10.1136/bmjopen-2022-066987), 2023-03-30
Supplement: bmjopen-2022-066987.draft_revisions.pdf [file bmjopen-2022-066987.draft_revisions.pdf]

# BMJ Open

BMJ Open is committed to open peer review. As part of this commitment we make the peer review history of every article we publish publicly available.

When an article is published we post the peer reviewers' comments and the authors' responses online. We also post the versions of the paper that were used during peer review. These are the versions that the peer review comments apply to.

The versions of the paper that follow are the versions that were submitted during the peer review process. They are not the versions of record or the final published versions. They should not be cited or distributed as the published version of this manuscript.

BMJ Open is an open access journal and the full, final, typeset and author-corrected version of record of the manuscript is available on our site with no access controls, subscription charges or pay-per-view fees (<http://bmjopen.bmj.com>).

If you have any questions on BMJ Open's open peer review process please email [info.bmjopen@bmj.com](mailto:info.bmjopen@bmj.com)

# BMJ Open

## Evaluation of the efficacy of Mecobalamine (Vit B12) in the treatment of long-term pain in women diagnosed with fibromyalgia: Randomized controlled trial protocol

|                               |                                                                                                                                                                                                                                                                                                                                                                                                                                                                                                                                                                                                                                                                                                                                                                                                                                                                                                                                                                          |
|-------------------------------|--------------------------------------------------------------------------------------------------------------------------------------------------------------------------------------------------------------------------------------------------------------------------------------------------------------------------------------------------------------------------------------------------------------------------------------------------------------------------------------------------------------------------------------------------------------------------------------------------------------------------------------------------------------------------------------------------------------------------------------------------------------------------------------------------------------------------------------------------------------------------------------------------------------------------------------------------------------------------|
| Journal:                      | <i>BMJ Open</i>                                                                                                                                                                                                                                                                                                                                                                                                                                                                                                                                                                                                                                                                                                                                                                                                                                                                                                                                                          |
| Manuscript ID                 | bmjopen-2022-066987                                                                                                                                                                                                                                                                                                                                                                                                                                                                                                                                                                                                                                                                                                                                                                                                                                                                                                                                                      |
| Article Type:                 | Protocol                                                                                                                                                                                                                                                                                                                                                                                                                                                                                                                                                                                                                                                                                                                                                                                                                                                                                                                                                                 |
| Date Submitted by the Author: | 04-Aug-2022                                                                                                                                                                                                                                                                                                                                                                                                                                                                                                                                                                                                                                                                                                                                                                                                                                                                                                                                                              |
| Complete List of Authors:     | Sall Hansson, Karin; Linnaeus University Faculty of Health and Life Sciences, Dept. of Health and Caring Sciences, Linnaeus University<br>Lindqvist, Gunilla; Linnaeus University Faculty of Health and Life Sciences, Dept. of Health and Caring Sciences, Linnaeus University<br>Stening, Kent; Linnaeus University Faculty of Health and Life Sciences, Dept. of Health and Caring Sciences, Linnaeus University<br>Fohlman, Jan; Region Kronoberg<br>Wojanovski, Anna; Region Kronoberg<br>Ponten, Moa; Karolinska Institute<br>Jensen, Karin; Karolinska Institute<br>Gerdle, Björn; Linkopings universitet, Pain and Rehabilitation Centre, and Department of Medical and Health Sciences<br>Elmqvist, Carina; Linnaeus University Faculty of Health and Life Sciences, Dept. of Health and Caring Sciences, Linnaeus University;<br>Linnaeus University Faculty of Health and Life Sciences, Centre of Interprofessional Cooperation within Emergency care (CICE) |
| Keywords:                     | COMPLEMENTARY MEDICINE, PAIN MANAGEMENT, QUALITATIVE RESEARCH, STATISTICS & RESEARCH METHODS, Clinical trials < THERAPEUTICS                                                                                                                                                                                                                                                                                                                                                                                                                                                                                                                                                                                                                                                                                                                                                                                                                                             |
|                               |                                                                                                                                                                                                                                                                                                                                                                                                                                                                                                                                                                                                                                                                                                                                                                                                                                                                                                                                                                          |

SCHOLARONE™  
Manuscripts

1  
2  
3 **Evaluation of the efficacy of Mecobalamine (Vit B12) in the treatment of**  
4 **long-term pain in women diagnosed with fibromyalgia: Randomized**  
5 **controlled trial protocol**  
6  
7  
8  
9

10 Karin Säll Hansson <sup>1 2</sup>  
11 RN, MScN, lecturer, Department of Health and Caring Sciences, Linnaeus  
12 University Växjö, Sweden  
13

14 Gunilla Lindqvist <sup>1 2</sup>  
15 RN, PhD, Senior lecturer, Department of Health and Caring Sciences,  
16 Linnaeus University, Växjö, Sweden.  
17  
18

19 Kent Stening <sup>1 2</sup>  
20 RN, PhD, Senior lecturer, Department of Health and Caring Sciences,  
21 Linnaeus University, Kalmar, Sweden  
22  
23

24 Jan Fohlman <sup>1 2</sup>  
25 MD, PhD, Associate Professor, Region Kronoberg, Sweden  
26  
27

28 Anna Wojanowski <sup>1 2</sup>  
29 MD, Region Kronoberg, Sweden  
30  
31

32 Moa Pontén, <sup>3</sup>  
33 MSc, Doctoral student, Department of Clinical Neuroscience, Karolinska  
34 Institutet, Sweden  
35

36 Karin Jensen, <sup>3</sup>  
37 Associate Professor, Department of Clinical Neuroscience, Karolinska  
38 Institutet, Sweden  
39

40 Björn Gerdle, <sup>4</sup>  
41 MD, PhD, Professor emeritus, Department of Health, Medicine and Caring  
42 Sciences, Linköping University, Linköping, Sweden  
43  
44

45 Carina Elmqvist, <sup>1 2</sup>  
46 RN, PhD, Associate Professor, Department of Health and Caring Sciences,  
47 Linnaeus University, Växjö, Head of Research, Region Kronoberg, Sweden  
48  
49

50 <sup>1</sup>Pain Research group, Linnaeus university

51 <sup>2</sup>Centre of Interprofessional Collaboration within Emergency care (CICE),  
52 Linnaeus university

53 <sup>3</sup>Neuroimagine lab, Karolinska Institute

54 <sup>4</sup>Pain and Rehabilitation Center, Linköping, Sweden  
55  
56

57 Corresponding author: Carina Elmqvist [carina.elmqvist@lnu.se](mailto:carina.elmqvist@lnu.se)  
58 RN, PhD, Associate Professor, Department of Health and Caring Sciences,  
59 Linnaeus University, Växjö, Head of Research, Region Kronoberg, Sweden  
60

## ABSTRACT

### Introduction

Fibromyalgia causes long term pain. It affects at least 2% of the population, the majority being women. In addition, extended symptoms corresponding to vitamin B12 deficiency occur. Primary studies indicate interaction effects between the receptor of NMDA which is involved in both long-term pain and vitamin B12 deficiency. The aim of the proposed study is to evaluate whether vitamin B12 decreases pain sensitivity and the experience of pain i.e. hyperalgesia and allodynia in women suffering of fibromyalgia.

### Methods and analysis

The study is a randomised placebo-controlled (RCT), single-blind, clinical trial with two parallel groups who are administered Mecobalamin (vitamin B12) v/s placebo over 12 weeks. Outcomes consist of questionnaires and QST measured at baseline and after 12 weeks of treatment. A final re-evaluation will then follow 12 weeks after treatment ends. In order to broaden the understanding of the lived experience, an interview is conducted using a phenomenological approach on a life-world theoretical basis, the Reflective Lifeworld Research approach (RLR).

### Ethics and dissemination

The protocol for the study is approved by the local ethical committee at Linköping (EPM); 2018/294-31 (Appendix 2019-00347; 2020-04482), and the Swedish Medical Products Agency; EudraCT-no 2015-005086-23 (Appendix 5.1-2020-71076). The study started 6 of February 2019, recruiting is delayed caused by COVID-19. Trial results expects during 2024 and will primarily be communicated through peer-reviewed journals and conferences.

**Title registration:** EUDRACT 2015-005086-23

**ClinicalTrials.gov:** ID NCT05008042

**Keywords:** Fibromyalgia, Cobalamin, Chronic pain, Mekobalamin, Randomised controlled trial, Vitamin B12

## STRENGTH AND LIMITATION OF THIS STUDY

- The trial is a collaboration between different universities and regions.
- To the best of our knowledge, this is the first trial that specifically examined the effect of Mecobalamin (Vitamin B12) on pain in the current patient group, women diagnosed with fibromyalgia.
- The recruitment period will likely be delayed by COVID-19.

## INTRODUCTION

Fibromyalgia causes long-term pain and affects at least 2% of the population, 80% of the sufferers being women (1). Treatment options are scarce and patients with fibromyalgia have experienced being discredited and invalidated by the health-care system (2). Fibromyalgia is characterized by long-term widespread musculoskeletal pain and generalized hyperalgesia. This is often accompanied by fatigue, concentration problems and sleep problems (3). Fibromyalgia pain is currently classified as nociplastic, which means that pain arises from altered regulation of pain signals, in absence of tissue damage (4).

No definite pathophysiology has been established for fibromyalgia. Imaging techniques have challenged previous ideas about the peripheral origin of FM and have provided evidence for altered central nervous system (CNS) nociceptive/pain processing and morphology in fibromyalgia. Furthermore, recent studies report both central alterations and peripheral alterations (e.g., systemic low-grade inflammation and nociceptor/muscle alterations) (5-9)

The treatment for Fibromyalgia includes both non-pharmacological and pharmacological interventions, depending on the key symptoms and the extent of disability. The recommended pharmacological treatments for Fibromyalgia are antidepressants (e.g. SNRI) and antiepileptics (e.g. gabapentinoids), which often bring side effects (4). In addition, opioid analgetics and NSAID/COX are often prescribed (10). However, only a

1  
2  
3 minority of individuals report a clinically relevant improvement from any of  
4 the treatments (11).  
5  
6  
7

8 Vitamin B12 is sometimes used for symptoms other than those of Vitamin  
9 B12 deficiency for example, different pain conditions such as backpain and  
10 neuropathic pain (12-16). Vitamin B12 nasal drops have also been tested and  
11 shown positive results on patients with ME/CF/fibromyalgia (myalgic  
12 encephalomyelitis/chronic fatigue syndrome) (17). In addition, there are  
13 Vitamin B12 studies that have shown good results in the therapy of aphthous  
14 ulcers (18) and acute lumbago (19) as well as in studies concerning diabetic  
15 polyneuropathy (20, 21). Moreover, there are studies that examined  
16 methylcobalamin treatment on patients with lower back pain showing pain  
17 reduction and functionality gain (13, 22).  
18  
19  
20  
21  
22  
23  
24  
25  
26

27 To summarize, it is not entirely clear how Vitamin B12 affects the human  
28 pain system. However, several studies indicate that it may be a possible  
29 treatment in fibromyalgia.  
30  
31  
32

### 33 **Aim and objectives**

34 The aim of this study is to evaluate the effect of Mecobalamin (Vitamin  
35 B12), and describe lived experiences of pain, health, suffering and well-  
36 being in women with diagnosed fibromyalgia.  
37  
38  
39  
40  
41  
42

43 The primary objective is to evaluate whether Mecobalamin (Vitamin B12)  
44 given as an intramuscular injection once/week for 12 weeks compared to  
45 placebo reduces pain sensitivity i.e. tolerance time (Cold Pressor Test).  
46  
47

48 The secondary objective is to evaluate whether intramuscular Mecobalamin  
49 (Vitamin B12) compared to placebo reduces pain intensity and pressure pain  
50 threshold (Numeric rating scale NRS, Pressure Algometry), increases activity  
51 level (questionnaire), quality of life (questionnaire) and perceived effect of  
52 given drug (questionnaire). Furthermore, the ratings of expected effects of a  
53 given drug (NRS), the desire for pain relief (NRS) and estimated pain  
54 variability (NRS) are evaluated. Qualitative interviews that describe how  
55  
56  
57  
58  
59  
60

women with fibromyalgia experience pain, health, suffering and well-being (interviews) will be conducted.

## METHODS AND ANALYSIS

### Study design

The study is a randomised placebo-controlled (RCT) single-blind clinical trial using parallel groups. Participants are individually randomised to intervention or control group (placebo) in 1:1 allocation. In order to broaden and deepen the understanding of the lived experience, an interview will be conducted applying a phenomenological approach on a life-world theoretical basis, Reflective Lifeworld Research approach (RLR) (23).

### Patient and public involvement

Patients and/or the public were not involved in the design, or conduct, or reporting, or dissemination plans of this research.

### Study sample

Women aged 20-70 years with an earlier recorded diagnosed fibromyalgia. Detailed eligibility criteria are presented in Table 1.

Table 1. Inclusion and exclusion criteria

| Inclusion criteria:                                                                                                                                                                                                                                                                                                                                                                                                                                                                                                               | Exclusion criteria:                                                                                                                                                                                                                                                                                                                                                                                                                        |
|-----------------------------------------------------------------------------------------------------------------------------------------------------------------------------------------------------------------------------------------------------------------------------------------------------------------------------------------------------------------------------------------------------------------------------------------------------------------------------------------------------------------------------------|--------------------------------------------------------------------------------------------------------------------------------------------------------------------------------------------------------------------------------------------------------------------------------------------------------------------------------------------------------------------------------------------------------------------------------------------|
| <ul style="list-style-type: none"> <li>- Diagnosis of fibromyalgia</li> <li>- Women aged 20-70 years</li> <li>- Swedish-speaking</li> <li>- Safe method of contraception</li> <li>- Cobalamin value &gt;250 pmol/L &lt; 800 pmol/L</li> <li>- Kidney function value (relatively) GFR &gt;60 mL/min/1.73 m<sup>2</sup></li> <li>- Liver function value P-ALP 0.6-2.85 µkat/L</li> <li>- P-ALAT 0.15-1.13 µkat/L</li> <li>- Heart function value Troponin-T &lt; 15 ng/L</li> <li>- NT-pro-BNP &lt; 60 year &lt;125 ng/L</li> </ul> | <ul style="list-style-type: none"> <li>- Previous treatment with B12</li> <li>- Known hypersensitivity to the active substance Mecobalamin or an additive</li> <li>- Neuroleptic treatment</li> <li>- Reynaud's phenomenon</li> <li>- Known neuropathy</li> <li>- Vegan as veganism can lead to B12 deficiency</li> <li>- Known heart, kidney or liver disease</li> <li>- Breastfeeding</li> <li>- Planned or ongoing pregnancy</li> </ul> |

|                                                                      |  |
|----------------------------------------------------------------------|--|
| NT-pro-BNP<br>> 60 year < 300 ng/L<br>- Given consent to participate |  |
|----------------------------------------------------------------------|--|

The participants are recruited via advertising in the local newspaper Facebook, YouTube, Fibromyalgia Association, posters at Linnaeus University, hospitals and healthcare centres. The prospective participant contacts the Trial Manager via telephone or email and receives oral information. Written information and consent form are sent to the participant who contacts the Trial Manager for an appointment.

### **Intervention and placebo to be measured**

The active substance of Vitamin B12 given in the study is Mecobalamin 5mg/ml 2 ml i.e. 10 mg intramuscularly (24). Placebo substance is Sodium Chloride (NaCl) 9 mg/ml 2 ml, isotonic solution for parenteral use (Baxter) intramuscularly (25). All participants are informed that their urine may turn red, which may occur during Mecobalamin injections.

### **Measurements**

At the first measurement opportunity, the trial manager and co-examiner 1 carefully goes through inclusion and exclusion criteria. Oral information is given again, and consent is signed by the participant and by the co-examiner 1. First, the participant answers two questionnaires Short-form McGill Pain Questionnaire (MPQ) (26) and RAND 36 (27), then stimulation tests (Cold Pressor Test, pressure algometry) (28 - 32) are performed followed of pain rating (NRS) (33) immediately, after one minute and after three minutes. Finally, blood samples for cobalamin (Vitamin B12), kidney, liver and heart function are taken. The participant provides a wrapped information card about the study's design, purpose, treatment options and contacts with telephone numbers. The participant is asked about interest in an interview in connection with the final measurement opportunity. Co-examiner 2 assesses the blood samples and approves final inclusion. If tests deviate from accepted reference values, the participant is excluded and encouraged to seek medical attention.



1  
2  
3 After approved inclusion, an independent chief examiner performs the  
4 randomisation. The participant then receives intramuscular injections of the  
5 active substance or placebo, once a week for 12 weeks, given by a registered  
6 nurse. Before each injection the participant answers questions in which they  
7 estimate their expected effects of a given drug, desire for pain relief and  
8 average pain intensity during the past week (NRS). The participant has the  
9 opportunity to postpone the visit  $\pm$  3 days, for example in case of illness or  
10 travelling and may miss a maximum of two injections in order to follow per  
11 protocol analysis. Even if the participant is not compliant with the study  
12 protocol, the participant may retain the treatment regime for the duration of  
13 the study and be analysed in Intention to Treat (ITT).  
14  
15  
16  
17  
18  
19  
20  
21  
22  
23

24 The second measurement takes place after 12 weeks of intervention and three  
25 questionnaires (MPQ, RAND 36) and (Patient Global Impression of Change  
26 PGIC) (34) are filled in. The stimulation tests Cold Pressor Test and pressure  
27 algometry are performed as well as blood sampling of cobalamin/p (Vitamin  
28 B12). In cases of low cobalamin/p, the participant is encouraged to seek  
29 medical attention but is still included in the study.  
30  
31  
32  
33  
34  
35

36 At the third measurement, the follow-up, which takes place 12 weeks after  
37 the end of the intervention, the participant fills in questionnaires (MPQ,  
38 RAND-36 and PGIC), undergoes stimulation tests (Cold Pressor Test and  
39 pressure algometry), blood sampling of cobalamin/p (Vitamin B12) together  
40 with an interview for those who so desire. If cobalamin/p on this occasion  
41 shows that the participant has a low cobalamin value, the participant is  
42 encouraged to seek medical attention. For the individual participant, the  
43 study ends after six months. An overview of the study flow is presented in  
44 Fig.1.  
45  
46  
47  
48  
49  
50  
51  
52  
53  
54

55 Please insert Figure 1 here  
56  
57  
58  
59  
60

## Outcomes

The primary outcome is

- Tolerance time, maximised to three minutes, which is tested using the Cold Pressor Test

The secondary outcome are;

- Pain experience and possible pain reduction measured by a pressure algometry test performed on the shoulder, hip, knee and elbow.
- The pain intensity measured by NRS.
- Ratings of expectation, desire for pain relief, and pain variability using NRS.
- Activity level and quality of life assessed using questionnaires MPQ and RAND-36.
- Experience of the effect of the drug assessed using questionnaire PGIC.
- Control of Vitamin B12 by measuring cobalamin in plasma.
- Qualitative in-depth interviews conducted to capture women's lived experiences of pain, health, suffering and well-being.

### Cold Pressor Test

The Cold Pressor Test (28-30) is measured in number of seconds the participant leaves her hand in the low-temperature water of five degrees. Evaluation variables from Cold Pressor Test become pain threshold (when it starts to hurt) and tolerance time, i.e. how long the participant endures the pain. Participants end the test by raising their hands when they can no longer stand it or when the set end time of three minutes has elapsed.

### Pressure algometry test

The pressure algometry test (31, 32) generates a mechanical pressure against specific points on the body; trapezius (shoulder), epicondyle (elbow), gluteal (outside the gluteal muscle) and medial knee (inside of the knee) which are all accepted in the diagnosis of fibromyalgia. Pressure algometry tests are measured in kilopascal (kPa). The Trial Manager interrupts the mechanical pressure when the participant expresses pain.

### Numeric rating scale (NRS)

Participants rate their pain intensity on NRS (33) in connection with the Cold Pressor Test when the participant takes her hand from the water, after one minute and finally after three minutes. Participants estimate their pain intensity on a scale (NRS) from 0-10, where 0 corresponds to no pain at all and 10 worst possible pain. Pain rating is measured in the same way after the pressure algometry test.

The influence of expectation, desire for pain relief, and pain variability will be measured before each injection using the same numeric rating scale as used for pain ratings. Ratings of expected pain levels will be obtained by asking patients “What level of pain do you expect when this treatment starts to have an effect?” The NRS scale is anchored at the left by the descriptors ‘no pain sensation’ and at the right by ‘the most pain sensation imaginable’. Ratings of desired pain relief will be obtained by asking patients “How strong is your desire for pain relief? The question will be anchored by the descriptors ‘0=No desire for pain relief’ and ‘10=the most intense desire for pain relief imaginable’. Ratings of pain variability will be obtained by asking participants their average pain intensity that week. These scales have been validated and used in previous studies (35-39).

### Short-form McGill Pain Questionnaire (MPQ)

In this study MPQ Short form of 15 questions (26) is used which distinguishes between the sensory-discriminatory and the affective and emotional aspects of the pain experience. Participants are asked to estimate their pain intensity and describe their pain in predetermined words. They fill in MPQ on all three measurement occasions.

### RAND-36

RAND-36 is a quality-of-life instrument (27) that aims to measure health-related quality of life, i.e. physical, mental and social well-being and not merely the absence of illness. The estimation instrument consists of 36 questions of various kinds, e.g. on general health, activity, physical health,

1  
2  
3 emotional problems and pain. RAND-36 is filled in by the participant on all  
4 three measurement occasions.  
5  
6  
7

#### 8 Patient Global Impression of Change (PGIC)

9  
10 PGIC (34) evaluates participants' experience of the treatment i.e. the  
11 substance given. Participants tick the box that most closely describes the  
12 change that they are experiencing. The PGIC is completed by the participant  
13 after the injection treatment has been concluded at 12 weeks and at the  
14 follow-up 12 weeks later. PGIC is directly translated in its entirety from  
15 English by the research group.  
16  
17  
18  
19  
20  
21

#### 22 Cobalamin/p

23  
24 Cobalamin/p levels are taken on three occasions: at the first measurement,  
25 baseline, in order to rule out that none of the participants has a Vitamin B12  
26 deficiency (according to the accepted reference value). At the second  
27 measurement, at 12 weeks on completion of treatment in order to monitor the  
28 participants' level of cobalamin/p just after the end of the injection treatment.  
29 The final measurement is 12 weeks after the end of intervention.  
30  
31  
32

#### 33 Qualitative in-depth interview

34  
35 In order to obtain a deeper understanding of women's perceived experiences,  
36 in-depth interviews with both compliant and non-compliant participants from  
37 both groups will be performed in connection with the third measurement  
38 session. The aim is to describe the women's lived experiences of pain,  
39 health, suffering and well-being. The interviews will be conducted by the  
40 Trial Manager, recorded, transcribed and later analysed using a reflective life  
41 world approach (RLR) (23).  
42  
43  
44  
45  
46  
47  
48  
49

#### 50 **Sample Size**

51  
52 In order to obtain an adequate sample size, a power analysis was performed  
53 based on results from a previously published study (28) in which women  
54 with the current diagnosis, fibromyalgia, underwent the same stimulation  
55 procedure with the Cold Pressor Test. Account is taken here of the standard  
56 deviation shown and compensation for any placebo effects. Based on these  
57  
58  
59  
60

1  
2  
3 results, the expected effect difference is estimated at 20 seconds with a  
4 standard deviation of 20 seconds between the two groups after 12 weeks of  
5 treatment with Mecobalamin (Vitamin B12)/placebo. Using a two-sided  
6 t-test for two independent groups, with a power of 80% and 5% significance  
7 level, it was calculated that each group would consist of 16 participants. In  
8 order to compensate for any loss, 20 participants per group are therefore  
9 included. The study continues until 40 participants have been included and  
10 completed the study.  
11  
12  
13  
14  
15  
16  
17  
18

### 19 **Randomisation and allocation concealment**

20 Participants are randomised into two groups, the placebo group or the  
21 treatment group, each consisting of 20 participants either receiving  
22 Mecobalamin (Vitamin B12) or placebo (NaCl). An independent statistician  
23 generates a randomisation list by random distribution of processing in blocks  
24 (1:1) in a computerised statistics program (STATA). Participants are  
25 randomised according to the list by the Chief Examiner opening closed  
26 randomisation envelopes in consecutive order. Based on each randomisation  
27 envelope, the Chief Examiner registers in and signs the injection retrieval  
28 protocol as to which substance the participant will receive. The participants'  
29 randomisation number is recorded in the journal. Only the Chief Examiner  
30 has access to randomisation envelopes and injection retrieval protocols  
31 which are kept locked.  
32  
33  
34  
35  
36  
37  
38  
39  
40

41 When the third measurement session has been completed, the Trial Manager  
42 contacts the Chief Examiner who has the randomisation list.

43 The Chief Examiner breaks the code and notifies the participant by letter of  
44 which substance she has been treated with. The code is broken at this time  
45 because it cannot be considered ethical that the participant does not find out  
46 about the treatment given, especially if the participant believes that the  
47 treatment has helped. If the participant has received Mecobalamin and  
48 wishes to continue, they are recommended to contact their health centre for  
49 continued Mecobalamin treatment. The letter will contain the contact  
50 information of the Trial Manager and the Chief Examiner if the health centre  
51 doctor wishes to contact them. The Trial Manager is still unaware of what the  
52 individual participant received until the study is completed. If the code needs  
53  
54  
55  
56  
57  
58  
59  
60

1  
2  
3 to be broken for an individual participant before the third measurement  
4 session has been completed, there is a code breaking envelope that may be  
5 used by the Chief Examiner in cases of emergency.  
6  
7  
8  
9

### 10 **Statistical methods**

11 The primary endpoint is tolerance time at Cold Pressor Test will be  
12 calculated on the difference between the two groups after 12 weeks and will  
13 be analysed by ANOVA. Pain thresholds measured by pressure algometry  
14 test (Somedic) will be analysed using: t-test, ANOVA, similar to the primary  
15 variable. Questionnaires (MPQ, RAND-36, and PGIC) will be analysed  
16 using Mann-Whitney tests. In cases of minor loss, (less than 10%), a mixed  
17 model can be used as an alternative to t-test and ANOVA with repeated  
18 measurement. For variables with more than 10% loss, imputation of data will  
19 be used. Drop-out participants will be described in a specific analysis.  
20 Rejection analysis will be performed on the participants who interrupt the  
21 study prematurely.  
22  
23  
24  
25  
26  
27  
28  
29  
30  
31

32 The study will present results both from “intention to treat” and “per  
33 protocol” analyses. Intention to treat" is defined as the participant is placed in  
34 the treatment group she had been randomised to. "Per protocol" is defined as  
35 the participant is placed in the treatment group she de facto received and  
36 carried out without significant protocol deviations. “Per protocol” will be  
37 presented as sensitivity analysis. The participant may miss a maximum of  
38 two injections.  
39  
40  
41  
42  
43  
44  
45

46 Self-reported ratings of desired and expected treatment outcome pre and post  
47 treatment will be implemented in linear regression models to predict any of  
48 the outcome measures. Repeated ratings of desired treatment outcome,  
49 expected treatment outcome and pain variability will be calculated as each  
50 participant's standard deviation from the repeated ratings and implemented in  
51 a linear regression model to predict possible outcome measures.  
52  
53  
54  
55  
56  
57  
58  
59  
60

## ETHICS AND DISSEMINATION

The protocol for the study is approved by the local ethical committee at Linköping (EPM); 2018/294-31 (Appendix 2019-00347; 2020-04482) and the Swedish Medical Products Agency; EudraCT-no 2015-005086-23 (Appendix 5.1-2020-71076) furthermore monitored from Forum Ostergotland, Linköpings university. The study is registered at ClinicalTrials.gov: ID NCT05008042, follows Good Clinical Practice (GCP) and adheres to the principles of the Helsinki Declaration (2013) (40). All participants must give their written as well as oral consent to participate. They will be informed that they may discontinue the study whenever they wish to without giving any reason for their decision. The study started 6 of February 2019, recruiting is delayed caused by COVID-19. Trial results expects during 2024 and will be disseminated at national and international conferences, peer-reviewed journals, newsletters and magazines.

## Discussion

The results of the study will investigate whether Vitamin B 12 decreases pain sensitivity and experience of pain in women suffering from fibromyalgia. The European Federation of the IASP (The international Association for the Study of Pain) (EFIC) Declaration from 2001 expressed that, “*very few people die of pain, many dies in pain and even more live in pain*”. To live in pain affects the whole human existence and people with chronic pain such as fibromyalgia often feel discredited, having to fight to assert their right to treatment and to receive the necessary care (2). Today, there is no curative treatment for fibromyalgia (41, 42). Since opioid analgesics, SNRI and gabapentinoids are the most used pharmacological treatments for Fibromyalgia, often with side effects (4, 10), there is a need for alternative treatments (11), with less side effects.

Furthermore, there is currently a lack of studies on patients' subjective experiences of living with long-term pain and fibromyalgia (43, 44), why it is important to evaluate the effect of Mecobalamin (Vitamin B12), and describe lived experiences of pain, health, suffering and well-being in women with diagnosed fibromyalgia.

## Acknowledgements

We thank Co-examiner and Medical Doctors; Anders Willstedt and Bjarne Sorensen as well as the Registered Nurse Ann-Louise Breider for their ongoing contributions and support.

## Author affiliations

<sup>1</sup>Pain Research group, Linnaeus university

<sup>2</sup>Centre of Interprofessional Collaboration within Emergency care (CICE),  
Linnaeus university

<sup>3</sup>Neuroimagine lab, Karolinska Institute

<sup>4</sup>Pain and Rehabilitation Center, Linkoping, Sweden

## Contributors

KSH, GL, KS, JF, AWo, MP, KJ, BG and CE planned the study design and all authors participated in the production of the analysis plan. All authors participated in the acquisition of data. KSH, GL, KS and CE prepared the first version of the manuscript and all authors participated in reviewing and drafting the manuscript. All authors have read and approved the final version.

## Conflict of interest

There are no conflicts of interest to report

## Funding

This trial was supported by grants from Medical Research Council of Southeast Sweden no: 479961; 656241; 854911 and Capio Research Foundation, Sweden no: 2018-3195; 2019-3277. The funding sources had no involvement in study design, data collection or the writing of this manuscript.

## REFERENCES

1. Heidari F, Afshari M, Moosazadeh M. Prevalence of fibromyalgia in general population and patients, a systematic review and meta-analysis. *Rheumatol Int* 2017;37:1527-39.



- 1  
2  
3  
4  
5 2. Säll Hansson K, Fridlund B, Brunt D, Hansson B. The meaning of the  
6 experiences of persons with chronic pain in their encounter with the health  
7 service. *Scand. J. Caring Sci.* 2011;25: 444-50.  
8  
9
- 10  
11 3. Kosec, E. (2019). *Physiology of pain and regulation*. In Kosec E, Lampa  
12 L, Nisell R. (Red.), *Pain and inflammation*. Lund: Studentlitteratur.  
13  
14
- 15  
16 4. Kosec E, Cohen M, Baron R, Gebhart GF, *et al.* (2016). Do we need a  
17 third mechanistic descriptor for chronic pain states? *Pain*, 157:1382–6.  
18  
19
- 20  
21 5. Jensen KB, Kosec E, Petzke F, Carville S, *et al.* (2009). "Evidence of  
22 dysfunctional pain inhibition in Fibromyalgia reflected in rACC during  
23 provoked pain." *Pain*, 144(1-2): 95-100.  
24  
25  
26  
27
- 28  
29 6. Sluka KA, Clauw DJ. (2016). "Neurobiology of fibromyalgia and chronic  
30 widespread pain." *Neuroscience*, 338: 114-129.  
31  
32  
33
- 34  
35 7. Gerdle B, Larsson B. (2018). Muscle. Fibromyalgia syndrome and  
36 widespread pain – from construction to relevant recognition. In: Häuser W  
37 and Perrot S. Philadelphia, Wolters Kluwer: 215- 231.  
38  
39
- 40  
41 8. Üçeyler N, Sommer C. (2018). Small nerve fiber pathology. Fibromyalgia  
42 syndrome and widespread pain - from construction to relevant recognition.  
43 In: Häuser W and Perrot S. Philadelphia, Wolters Kluwer: 204-214.  
44  
45  
46  
47
- 48  
49 9. Albrecht DS, Forsberg A, Sandstrom A, Bergan C *et al.* (2019). "Brain  
50 glial activation in fibromyalgia - A multi-site positron emission tomography  
51 investigation." *Brain Behav Immun* 75: 72-83.  
52  
53
- 54  
55 10. Werner M. (2019) *Pharmacology*. In Werner M, Bäckryd E. (Red.),  
56 *Acute and cancer related pain. Pain medicine vol 1*. Stockholm Liber.  
57
- 58  
59 11. Moore RA, Fisher E, Häuser W, Bell RF, *et al.* (2021). Pharmacological  
60 therapies for fibromyalgia (fibromyalgia syndrome) in adults - an overview

1  
2  
3 of Cochrane Reviews. *Cochrane Database of Systematic Reviews*, 2021;  
4 Issue 8. Art. No.: CD013151.  
5  
6  
7

8  
9 12. Ming Z, Wenjuan H, Sanjue H, Hui X. Methylcobolamin: A potential  
10 Vitamin of Pain Killer. *Neural Plasticity* 2013; Article ID 424651, 6p.  
11  
12

13  
14 13. Chiu, CK., Low, TH., Tey YS., Singh, VA. & Shong, HK. (2011). The  
15 efficacy and safety of intramuscular injections of methylcobalamin in  
16 patients with chronic nonspecific low back pain: a randomized controlled  
17 trial. *SMJ*, Dec; 52 (12): 868-73.  
18  
19

20  
21  
22 14. Jurna I. (1998). Analgesic and analgesia-potentiating action of B vitamins.  
23 *Schmerz*, Apr, 20;12 (2):136-41.  
24  
25

26  
27  
28 15. Yu CZ, Liu YP, Lui S, Yan M, *et al.* (2014). Systematic administration  
29 of B vitamins attenuates neuropathic hyperalgesia and reduces spinal neuron  
30 injury following temporary spinal cord ischemia in rats. *Eur J Pain*, Jan; 18  
31 (1): 76-85.  
32  
33

34  
35  
36 16. Julian T, Syeed R, Glasgow N, Angelopoulou E *et al.* (2020)  
37 B12 as a treatment for Peripheral Neurophatic Pain; A Systematic Review.  
38 *Nutrients* 12(8), 2221.  
39  
40

41  
42  
43 17. MC van Campen L, Riepma K, Visser FC. (2019). Open Trial of Vitamin  
44 B12 Nasal Drops in Adults With Myalgic Encephalomyelitis/Chronic  
45 Fatigue Syndrome: Comparison of Responders and Non-Responders. *Front*  
46 *Pharmacol.* Sep; 20;10:1102  
47  
48  
49

50  
51  
52 18. Liu HL, Chiu SC. (2015). The effectiveness of vitamin B12 for relieving  
53 pain in aphthous ulcers: a randomized, double-blind, placebo controlled trial.  
54 *Pain Manag Nurs.* 16 (3), 182-187.  
55  
56  
57  
58  
59  
60

- 1  
2  
3 19. Mibielli MA, Geller M, Cohen JC, Goldberg SG, *et al.* (2019).  
4 Diclofenac plus B vitamins versus diclofenac monotherapy in lumbago: the  
5 DOLOR study. *Curr Med Res Opin.* Nov; 25(11):2589-99.  
6  
7  
8  
9  
10 20. Yaqub BA, Saddique A, Sulimani R. (1992). Effects of methylcobalamin  
11 on diabetic neuropathy. *Clin Neurol Neurosurg.* 94(2), 105-111.  
12  
13  
14  
15 21. Fonseca VA, Lavery L, Thethi T, Daoud Y, *et al.* (2013). Metanx in type  
16 2 diabetes with peripheral neuropathy: a randomized trial. *Am J Med.* 126(2),  
17 141-9.  
18  
19  
20  
21  
22 22. Mauro GL, Martorana U, Cataldo P, Brancato G, *et al.* (2000). Vitamin  
23 B12 in low back pain: a randomised, double blind, placebo-controlled study.  
24 *Eur Rev Pharmacol Sci.* 4 (3), 53-8.  
25  
26  
27  
28  
29 23. Dahlberg K, Dahlberg H, Nyström M. (2008) *Reflective Lifeworld*  
30 *Research.* Lund: Studentlitteratur.  
31  
32  
33  
34 24. APL's Summary of Product Characteristics, Product Monograph  
35 Mekobalamin  
36  
37 [https://www.apl.se/samhallsuppdraget/aida.html?sv.target=12.1f169aa21730](https://www.apl.se/samhallsuppdraget/aida.html?sv.target=12.1f169aa2173042d75c421c68&sv.12.1f169aa2173042d75c421c68.route=%2Fproduct%2F176%2Fdocument&returnTo=%7B%22route%22%3A%22%2Ftherapyarea%2F5%2Fproducts%22%7D)  
38 [42d75c421c68&sv.12.1f169aa2173042d75c421c68.route=%2Fproduct%2F1](https://www.apl.se/samhallsuppdraget/aida.html?sv.target=12.1f169aa2173042d75c421c68&sv.12.1f169aa2173042d75c421c68.route=%2Fproduct%2F176%2Fdocument&returnTo=%7B%22route%22%3A%22%2Ftherapyarea%2F5%2Fproducts%22%7D)  
39 [76%2Fdocument&returnTo=%7B%22route%22%3A%22%2Ftherapyarea%](https://www.apl.se/samhallsuppdraget/aida.html?sv.target=12.1f169aa2173042d75c421c68&sv.12.1f169aa2173042d75c421c68.route=%2Fproduct%2F176%2Fdocument&returnTo=%7B%22route%22%3A%22%2Ftherapyarea%2F5%2Fproducts%22%7D)  
40 [2F5%2Fproducts%22%7D](https://www.apl.se/samhallsuppdraget/aida.html?sv.target=12.1f169aa2173042d75c421c68&sv.12.1f169aa2173042d75c421c68.route=%2Fproduct%2F176%2Fdocument&returnTo=%7B%22route%22%3A%22%2Ftherapyarea%2F5%2Fproducts%22%7D). (Retrieved 2102125)  
41  
42  
43  
44  
45  
46 25. FASS Natriumklorid  
47  
48 <https://www.fass.se/LIF/product?userType=0&nplId=19900316000177>  
49 (Retrieved 20210225)  
50  
51  
52  
53 26. Buckhardt CS, Bjelle A. A Swedish Version of the Short-Form McGill  
54 Pain Questionnaire. *Scand. J. Rheumatol.* 1994;Vol 23, Issue 2  
55  
56  
57  
58  
59  
60

- 1  
2  
3 27. Orwelius L, Nilsson M, Nilsson E, Wenemark M, *et al.* The Swedish  
4 RAND-36 health Survey-reliability and responsiveness assessed in patient  
5 populations using Svensson's method for paired ordinal data. *J Patient Rep*  
6 *Outcomes*, 2017;2(1):4.  
7  
8  
9  
10  
11 28. Stening K, Eriksson O, Wahren LK, Berg G, *et al.* Pain sensations to the  
12 cold pressor test in normally menstruating women: comparison with men and  
13 relation to menstrual phase and serum sex steroid levels. *Am. J. Physiol. Cell*  
14 *Physiol.* 2007;Vol. 293 no. 4.  
15  
16  
17 29. Stening KD, Eriksson O, Henriksson KG, Brynhildsen J, *et al.* Hormonal  
18 replacement therapy does not affect self-estimated pain or experimental  
19 pain responses in post-menopausal women suffering fibromyalgia a double-  
20 blind, randomized, placebo-controlled trial. *Rheumatology* 2011;50;544-55.  
21  
22  
23 30. Walsh NE, Schoenfeld L, Ramamurthy S, Hoffman J. Normative model  
24 for cold pressor test. *Am J Phys Med Rehabil* 1989;68:6-11.  
25  
26  
27 31. Ficher AA. Pressure algometry over normal muscles. Standard values,  
28 validity and reproducibility of pressure threshold. *Pain* 1987;30:115-126.  
29  
30  
31 32. Rolke R, Andrews Campell K, Magerl W, Treede RD. Deep pain  
32 threshold in the distal limb of healthy human subjects. *Eur J Pain*  
33 2005;9: 39-48.  
34  
35  
36 33. Numeric Rating Scale (NRS). [https://www.vardhandboken.se/vard-och-  
37 behandling/akut-bedomning-och-skattning/smarts kattning-av-akut-och-  
38 postoperativ-smarta/smarts kattningsinstrument/](https://www.vardhandboken.se/vard-och-behandling/akut-bedomning-och-skattning/smarts kattning-av-akut-och-postoperativ-smarta/smarts kattningsinstrument/) (Retrieved 20220103).  
39  
40  
41 34. Rampakakis E, Ste-Marie P, Sampalis J, Karellis A, *et al.* Real-life  
42 assesment of the validity of patient global impression of change in  
43 fibromyalgia. *RMD Open* 2015;1(1).  
44  
45  
46  
47  
48  
49  
50  
51  
52  
53  
54  
55  
56  
57  
58  
59  
60

- 1  
2  
3 35. Vase EL, Robinson GM, Verne DN, Price DD. (2005). Increased placebo  
4 analgesia over time in irritable bowel syndrome (IBS) patients is associated  
5 with desire and expectation but not endogenous opioid mechanisms.  
6 *Pain*,115:338-47.  
7  
8  
9 36. Vase EL, Robinson GM, Verne DN, Price DD. (2003). The contributions  
10 of suggestion, desire, and expectation to placebo effects in irritable bowel  
11 syndrome patients: An empirical investigation. *Pain*,105:17-25.  
12  
13 37. Price DD, Barrell JJ. (1984). Some General Laws of Human Emotion -  
14 Interrelationships between Intensities of Desire, Expectation, and Emotional  
15 Feeling. *J Pers*, 52:389-409.  
16  
17 38. Price DD, Milling LS, Kirsch I, Duff A *et al.* (1999). An analysis of  
18 factors that contribute to the magnitude of placebo analgesia in an  
19 experimental paradigm. *Pain*, 83:147-56.  
20  
21 39. Kosek E, Rosen A, Carville S, *et al.* (2017). Lower Placebo Responses  
22 After Long- Term Exposure to Fibromyalgia Pain. *J Pain*, 18:835-43.  
23  
24 40. The Declaration of Helsinki 2013 [https://www.wma.net/policies-  
25 post/wma-declaration-of-helsinki-ethical-principles-for-medical-research-  
26 involving-human-subjects/](https://www.wma.net/policies-post/wma-declaration-of-helsinki-ethical-principles-for-medical-research-involving-human-subjects/) (Retrieved 20220103)  
27  
28  
29  
30  
31  
32  
33 41. Choy E. (2015). *Fibromyalgia Syndrome*, 2<sup>nd</sup> ed.. Oxford Rheumatology  
34 Library. Oxford: University press.  
35  
36  
37  
38 42. Magnusson S, Mannheimer C. (2015) *Long lasting pain. Treatment and  
39 rehabilitation*. Lund, Studentlitteratur  
40  
41  
42  
43 43. Cooper S, Gilbert L. An exploratory study of the experience of  
44 fibromyalgia diagnosis in *South Africa*. *Health*, 2017;21(3), 337-353.  
45  
46  
47  
48 44. Fitzcharles MA, Yunus MB. The clinical concept of fibromyalgia as a  
49 changing paradigm in the past 20 years. *Pain Res Treat*, 2012: 184835.  
50  
51  
52  
53  
54  
55  
56  
57  
58  
59  
60

1  
2  
3  
4  
5  
6  
7  
8  
9  
10  
11  
12  
13  
14  
15  
16  
17  
18  
19  
20  
21  
22  
23  
24  
25  
26  
27  
28  
29  
30  
31  
32  
33  
34  
35  
36  
37  
38  
39  
40  
41  
42  
43  
44  
45  
46  
47  
48  
49  
50  
51  
52  
53  
54  
55  
56  
57  
58  
59  
60

For peer review only

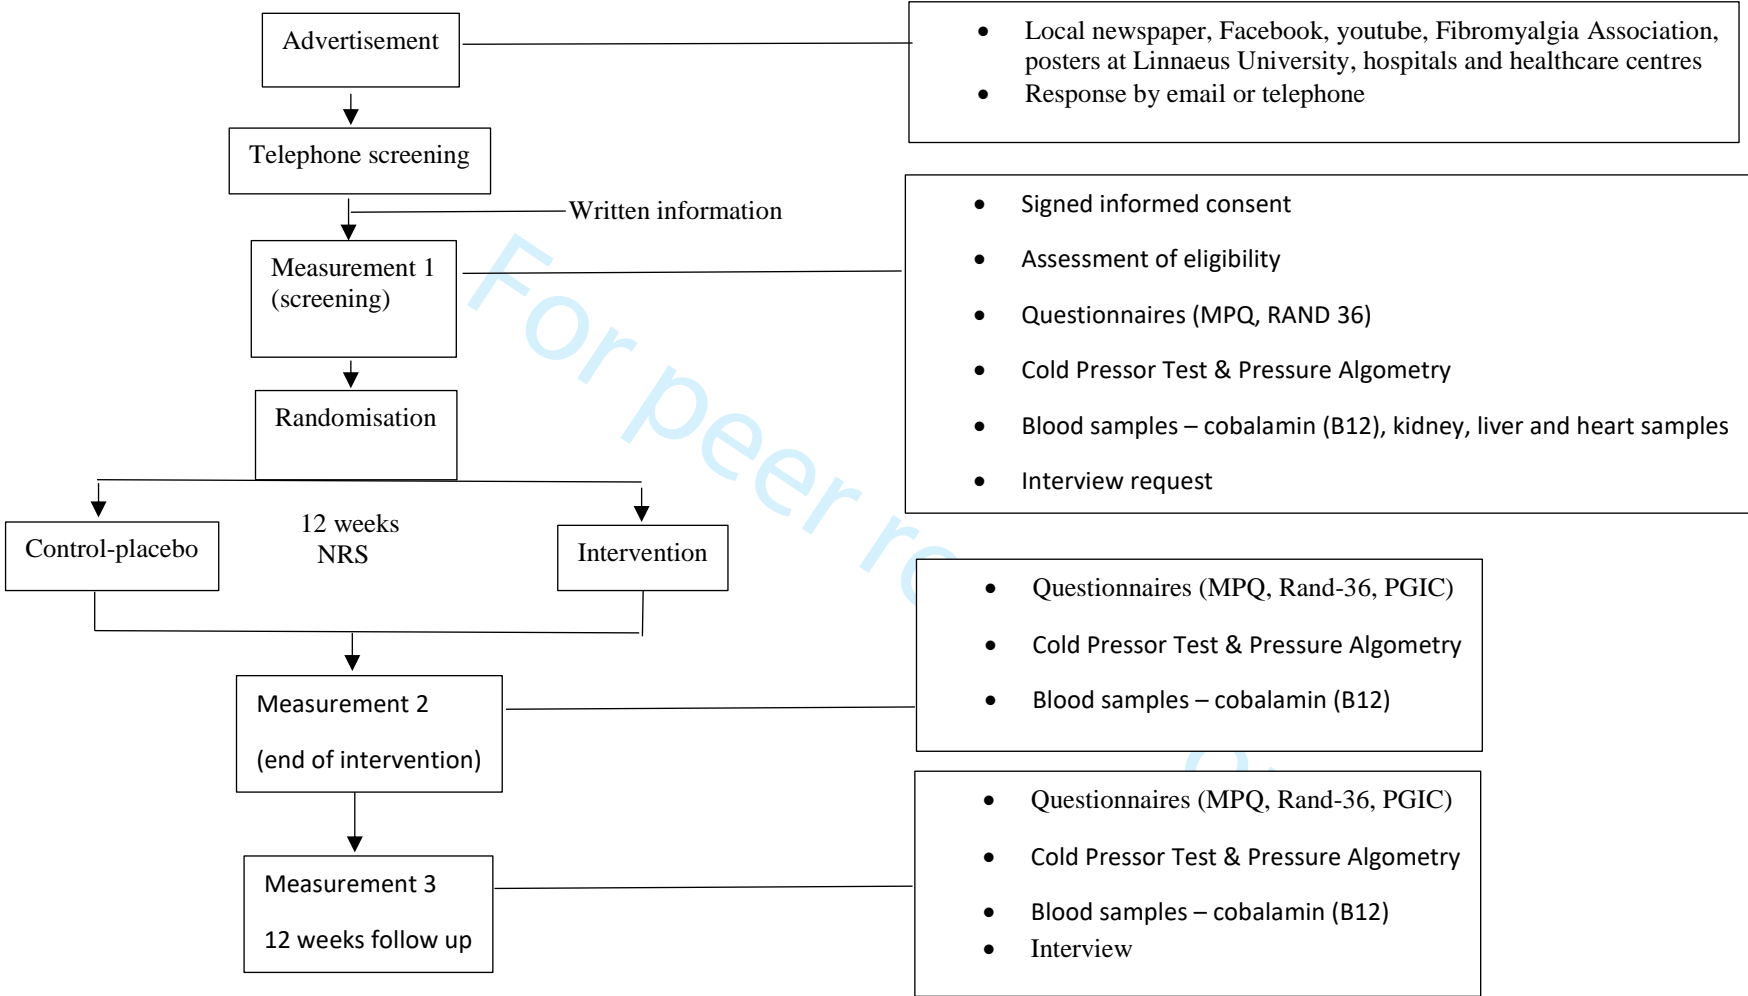

Fig 1. Flowchart of participants, outcome measures and follow-up points

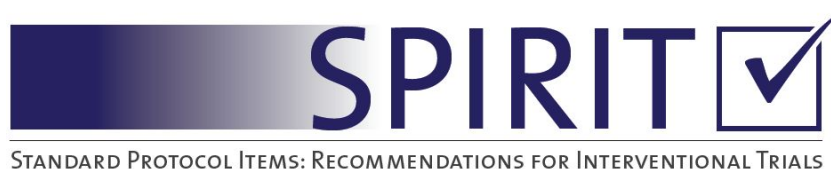

SPIRIT 2013 Checklist: Recommended items to address in a clinical trial protocol and related documents\*

| Section/item                      | Item No | Description                                                                                                                                                                                                                                                                              |
|-----------------------------------|---------|------------------------------------------------------------------------------------------------------------------------------------------------------------------------------------------------------------------------------------------------------------------------------------------|
| <b>Administrative information</b> |         |                                                                                                                                                                                                                                                                                          |
| Title                             | 1       | Descriptive title identifying the study design, population, interventions, and, if applicable, trial acronym                                                                                                                                                                             |
| Trial registration                | 2a      | Trial identifier and registry name. If not yet registered, name of intended registry                                                                                                                                                                                                     |
|                                   | 2b      | All items from the World Health Organization Trial Registration Data Set                                                                                                                                                                                                                 |
| Protocol version                  | 3       | Date and version identifier                                                                                                                                                                                                                                                              |
| Funding                           | 4       | Sources and types of financial, material, and other support                                                                                                                                                                                                                              |
| Roles and responsibilities        | 5a      | Names, affiliations, and roles of protocol contributors                                                                                                                                                                                                                                  |
|                                   | 5b      | Name and contact information for the trial sponsor                                                                                                                                                                                                                                       |
|                                   | 5c      | Role of study sponsor and funders, if any, in study design; collection, management, analysis, and interpretation of data; writing of the report; and the decision to submit the report for publication, including whether they will have ultimate authority over any of these activities |
|                                   | 5d      | Composition, roles, and responsibilities of the coordinating centre, steering committee, endpoint adjudication committee, data management team, and other individuals or groups overseeing the trial, if applicable (see Item 21a for data monitoring committee)                         |
| <b>Introduction</b>               |         |                                                                                                                                                                                                                                                                                          |
| Background and rationale          | 6a      | Description of research question and justification for undertaking the trial, including summary of relevant studies (published and unpublished) examining benefits and harms for each intervention                                                                                       |
|                                   | 6b      | Explanation for choice of comparators                                                                                                                                                                                                                                                    |
| Objectives                        | 7       | Specific objectives or hypotheses                                                                                                                                                                                                                                                        |
| Trial design                      | 8       | Description of trial design including type of trial (eg, parallel group, crossover, factorial, single group), allocation ratio, and framework (eg, superiority, equivalence, noninferiority, exploratory)                                                                                |



## Methods: Participants, interventions, and outcomes

|                      |     |                                                                                                                                                                                                                                                                                                                                                                                |
|----------------------|-----|--------------------------------------------------------------------------------------------------------------------------------------------------------------------------------------------------------------------------------------------------------------------------------------------------------------------------------------------------------------------------------|
| Study setting        | 9   | Description of study settings (eg, community clinic, academic hospital) and list of countries where data will be collected. Reference to where list of study sites can be obtained                                                                                                                                                                                             |
| Eligibility criteria | 10  | Inclusion and exclusion criteria for participants. If applicable, eligibility criteria for study centres and individuals who will perform the interventions (eg, surgeons, psychotherapists)                                                                                                                                                                                   |
| Interventions        | 11a | Interventions for each group with sufficient detail to allow replication, including how and when they will be administered                                                                                                                                                                                                                                                     |
|                      | 11b | Criteria for discontinuing or modifying allocated interventions for a given trial participant (eg, drug dose change in response to harms, participant request, or improving/worsening disease)                                                                                                                                                                                 |
|                      | 11c | Strategies to improve adherence to intervention protocols, and any procedures for monitoring adherence (eg, drug tablet return, laboratory tests)                                                                                                                                                                                                                              |
|                      | 11d | Relevant concomitant care and interventions that are permitted or prohibited during the trial                                                                                                                                                                                                                                                                                  |
| Outcomes             | 12  | Primary, secondary, and other outcomes, including the specific measurement variable (eg, systolic blood pressure), analysis metric (eg, change from baseline, final value, time to event), method of aggregation (eg, median, proportion), and time point for each outcome. Explanation of the clinical relevance of chosen efficacy and harm outcomes is strongly recommended |
| Participant timeline | 13  | Time schedule of enrolment, interventions (including any run-ins and washouts), assessments, and visits for participants. A schematic diagram is highly recommended (see Figure)                                                                                                                                                                                               |
| Sample size          | 14  | Estimated number of participants needed to achieve study objectives and how it was determined, including clinical and statistical assumptions supporting any sample size calculations                                                                                                                                                                                          |
| Recruitment          | 15  | Strategies for achieving adequate participant enrolment to reach target sample size                                                                                                                                                                                                                                                                                            |

## Methods: Assignment of interventions (for controlled trials)

### Allocation:

|                     |     |                                                                                                                                                                                                                                                                                                                                                          |
|---------------------|-----|----------------------------------------------------------------------------------------------------------------------------------------------------------------------------------------------------------------------------------------------------------------------------------------------------------------------------------------------------------|
| Sequence generation | 16a | Method of generating the allocation sequence (eg, computer-generated random numbers), and list of any factors for stratification. To reduce predictability of a random sequence, details of any planned restriction (eg, blocking) should be provided in a separate document that is unavailable to those who enrol participants or assign interventions |
|---------------------|-----|----------------------------------------------------------------------------------------------------------------------------------------------------------------------------------------------------------------------------------------------------------------------------------------------------------------------------------------------------------|

|    |                |     |                                                                         |
|----|----------------|-----|-------------------------------------------------------------------------|
| 1  |                |     |                                                                         |
| 2  | Allocation     | 16b | Mechanism of implementing the allocation sequence (eg, central          |
| 3  | concealment    |     | telephone; sequentially numbered, opaque, sealed envelopes),            |
| 4  | mechanism      |     | describing any steps to conceal the sequence until interventions are    |
| 5  |                |     | assigned                                                                |
| 6  |                |     |                                                                         |
| 7  | Implementation | 16c | Who will generate the allocation sequence, who will enrol participants, |
| 8  |                |     | and who will assign participants to interventions                       |
| 9  |                |     |                                                                         |
| 10 | Blinding       | 17a | Who will be blinded after assignment to interventions (eg, trial        |
| 11 | (masking)      |     | participants, care providers, outcome assessors, data analysts), and    |
| 12 |                |     | how                                                                     |
| 13 |                | 17b | If blinded, circumstances under which unblinding is permissible, and    |
| 14 |                |     | procedure for revealing a participant's allocated intervention during   |
| 15 |                |     | the trial                                                               |
| 16 |                |     |                                                                         |
| 17 |                |     |                                                                         |
| 18 |                |     |                                                                         |
| 19 |                |     |                                                                         |

### Methods: Data collection, management, and analysis

|    |                 |     |                                                                          |
|----|-----------------|-----|--------------------------------------------------------------------------|
| 20 |                 |     |                                                                          |
| 21 | Data collection | 18a | Plans for assessment and collection of outcome, baseline, and other      |
| 22 | methods         |     | trial data, including any related processes to promote data quality (eg, |
| 23 |                 |     | duplicate measurements, training of assessors) and a description of      |
| 24 |                 |     | study instruments (eg, questionnaires, laboratory tests) along with      |
| 25 |                 |     | their reliability and validity, if known. Reference to where data        |
| 26 |                 |     | collection forms can be found, if not in the protocol                    |
| 27 |                 | 18b | Plans to promote participant retention and complete follow-up,           |
| 28 |                 |     | including list of any outcome data to be collected for participants who  |
| 29 |                 |     | discontinue or deviate from intervention protocols                       |
| 30 |                 |     |                                                                          |
| 31 | Data            | 19  | Plans for data entry, coding, security, and storage, including any       |
| 32 | management      |     | related processes to promote data quality (eg, double data entry;        |
| 33 |                 |     | range checks for data values). Reference to where details of data        |
| 34 |                 |     | management procedures can be found, if not in the protocol               |
| 35 |                 |     |                                                                          |
| 36 | Statistical     | 20a | Statistical methods for analysing primary and secondary outcomes.        |
| 37 | methods         |     | Reference to where other details of the statistical analysis plan can be |
| 38 |                 |     | found, if not in the protocol                                            |
| 39 |                 | 20b | Methods for any additional analyses (eg, subgroup and adjusted           |
| 40 |                 |     | analyses)                                                                |
| 41 |                 | 20c | Definition of analysis population relating to protocol non-adherence     |
| 42 |                 |     | (eg, as randomised analysis), and any statistical methods to handle      |
| 43 |                 |     | missing data (eg, multiple imputation)                                   |
| 44 |                 |     |                                                                          |
| 45 |                 |     |                                                                          |
| 46 |                 |     |                                                                          |
| 47 |                 |     |                                                                          |
| 48 |                 |     |                                                                          |
| 49 |                 |     |                                                                          |
| 50 |                 |     |                                                                          |
| 51 |                 |     |                                                                          |

### Methods: Monitoring

|    |                 |     |                                                                      |
|----|-----------------|-----|----------------------------------------------------------------------|
| 52 |                 |     |                                                                      |
| 53 | Data monitoring | 21a | Composition of data monitoring committee (DMC); summary of its role  |
| 54 |                 |     | and reporting structure; statement of whether it is independent from |
| 55 |                 |     | the sponsor and competing interests; and reference to where further  |
| 56 |                 |     | details about its charter can be found, if not in the protocol.      |
| 57 |                 |     | Alternatively, an explanation of why a DMC is not needed             |
| 58 |                 |     |                                                                      |
| 59 |                 |     |                                                                      |
| 60 |                 |     |                                                                      |

|    |          |     |                                                                        |
|----|----------|-----|------------------------------------------------------------------------|
| 1  |          |     |                                                                        |
| 2  |          | 21b | Description of any interim analyses and stopping guidelines, including |
| 3  |          |     | who will have access to these interim results and make the final       |
| 4  |          |     | decision to terminate the trial                                        |
| 5  |          |     |                                                                        |
| 6  | Harms    | 22  | Plans for collecting, assessing, reporting, and managing solicited and |
| 7  |          |     | spontaneously reported adverse events and other unintended effects     |
| 8  |          |     | of trial interventions or trial conduct                                |
| 9  |          |     |                                                                        |
| 10 |          |     |                                                                        |
| 11 | Auditing | 23  | Frequency and procedures for auditing trial conduct, if any, and       |
| 12 |          |     | whether the process will be independent from investigators and the     |
| 13 |          |     | sponsor                                                                |
| 14 |          |     |                                                                        |

### Ethics and dissemination

|    |                   |     |                                                                               |
|----|-------------------|-----|-------------------------------------------------------------------------------|
| 15 |                   |     |                                                                               |
| 16 |                   |     |                                                                               |
| 17 | Research ethics   | 24  | Plans for seeking research ethics committee/institutional review board        |
| 18 | approval          |     | (REC/IRB) approval                                                            |
| 19 |                   |     |                                                                               |
| 20 |                   |     |                                                                               |
| 21 | Protocol          | 25  | Plans for communicating important protocol modifications (eg,                 |
| 22 | amendments        |     | changes to eligibility criteria, outcomes, analyses) to relevant parties      |
| 23 |                   |     | (eg, investigators, REC/IRBs, trial participants, trial registries, journals, |
| 24 |                   |     | regulators)                                                                   |
| 25 |                   |     |                                                                               |
| 26 | Consent or assent | 26a | Who will obtain informed consent or assent from potential trial               |
| 27 |                   |     | participants or authorised surrogates, and how (see Item 32)                  |
| 28 |                   |     |                                                                               |
| 29 |                   | 26b | Additional consent provisions for collection and use of participant data      |
| 30 |                   |     | and biological specimens in ancillary studies, if applicable                  |
| 31 |                   |     |                                                                               |
| 32 |                   |     |                                                                               |
| 33 | Confidentiality   | 27  | How personal information about potential and enrolled participants will       |
| 34 |                   |     | be collected, shared, and maintained in order to protect confidentiality      |
| 35 |                   |     | before, during, and after the trial                                           |
| 36 |                   |     |                                                                               |
| 37 | Declaration of    | 28  | Financial and other competing interests for principal investigators for       |
| 38 | interests         |     | the overall trial and each study site                                         |
| 39 |                   |     |                                                                               |
| 40 |                   |     |                                                                               |
| 41 | Access to data    | 29  | Statement of who will have access to the final trial dataset, and             |
| 42 |                   |     | disclosure of contractual agreements that limit such access for               |
| 43 |                   |     | investigators                                                                 |
| 44 |                   |     |                                                                               |
| 45 | Ancillary and     | 30  | Provisions, if any, for ancillary and post-trial care, and for                |
| 46 | post-trial care   |     | compensation to those who suffer harm from trial participation                |
| 47 |                   |     |                                                                               |
| 48 | Dissemination     | 31a | Plans for investigators and sponsor to communicate trial results to           |
| 49 | policy            |     | participants, healthcare professionals, the public, and other relevant        |
| 50 |                   |     | groups (eg, via publication, reporting in results databases, or other         |
| 51 |                   |     | data sharing arrangements), including any publication restrictions            |
| 52 |                   |     |                                                                               |
| 53 |                   |     |                                                                               |
| 54 |                   | 31b | Authorship eligibility guidelines and any intended use of professional        |
| 55 |                   |     | writers                                                                       |
| 56 |                   |     |                                                                               |
| 57 |                   | 31c | Plans, if any, for granting public access to the full protocol, participant-  |
| 58 |                   |     | level dataset, and statistical code                                           |
| 59 |                   |     |                                                                               |
| 60 |                   |     |                                                                               |

## Appendices

|                            |    |                                                                                                                                                                                                |
|----------------------------|----|------------------------------------------------------------------------------------------------------------------------------------------------------------------------------------------------|
| Informed consent materials | 32 | Model consent form and other related documentation given to participants and authorised surrogates                                                                                             |
| Biological specimens       | 33 | Plans for collection, laboratory evaluation, and storage of biological specimens for genetic or molecular analysis in the current trial and for future use in ancillary studies, if applicable |

---

\*It is strongly recommended that this checklist be read in conjunction with the SPIRIT 2013 Explanation & Elaboration for important clarification on the items. Amendments to the protocol should be tracked and dated. The SPIRIT checklist is copyrighted by the SPIRIT Group under the Creative Commons "[Attribution-NonCommercial-NoDerivs 3.0 Unported](#)" license.

For peer review only

# BMJ Open

## Efficacy of mecobalamin (vitamin B12) in the treatment of long-term pain in women diagnosed with fibromyalgia: protocol for a randomized, placebo-controlled trial

|                                 |                                                                                                                                                                                                                                                                                                                                                                                                                                                                                                                                                                                                                                                                                                                                                                                                                                                                                                                                                                          |
|---------------------------------|--------------------------------------------------------------------------------------------------------------------------------------------------------------------------------------------------------------------------------------------------------------------------------------------------------------------------------------------------------------------------------------------------------------------------------------------------------------------------------------------------------------------------------------------------------------------------------------------------------------------------------------------------------------------------------------------------------------------------------------------------------------------------------------------------------------------------------------------------------------------------------------------------------------------------------------------------------------------------|
| Journal:                        | <i>BMJ Open</i>                                                                                                                                                                                                                                                                                                                                                                                                                                                                                                                                                                                                                                                                                                                                                                                                                                                                                                                                                          |
| Manuscript ID                   | bmjopen-2022-066987.R1                                                                                                                                                                                                                                                                                                                                                                                                                                                                                                                                                                                                                                                                                                                                                                                                                                                                                                                                                   |
| Article Type:                   | Protocol                                                                                                                                                                                                                                                                                                                                                                                                                                                                                                                                                                                                                                                                                                                                                                                                                                                                                                                                                                 |
| Date Submitted by the Author:   | 22-Jan-2023                                                                                                                                                                                                                                                                                                                                                                                                                                                                                                                                                                                                                                                                                                                                                                                                                                                                                                                                                              |
| Complete List of Authors:       | Sall Hansson, Karin; Linnaeus University Faculty of Health and Life Sciences, Dept. of Health and Caring Sciences, Linnaeus University<br>Lindqvist, Gunilla; Linnaeus University Faculty of Health and Life Sciences, Dept. of Health and Caring Sciences, Linnaeus University<br>Stening, Kent; Linnaeus University Faculty of Health and Life Sciences, Dept. of Health and Caring Sciences, Linnaeus University<br>Fohlman, Jan; Region Kronoberg<br>Wojanowski, Anna; Region Kronoberg<br>Ponten, Moa; Karolinska Institute<br>Jensen, Karin; Karolinska Institute<br>Gerdle, Björn; Linkopings universitet, Pain and Rehabilitation Centre, and Department of Medical and Health Sciences<br>Elmqvist, Carina; Linnaeus University Faculty of Health and Life Sciences, Dept. of Health and Caring Sciences, Linnaeus University;<br>Linnaeus University Faculty of Health and Life Sciences, Centre of Interprofessional Cooperation within Emergency care (CICE) |
| <b>Primary Subject Heading</b>: | Complementary medicine                                                                                                                                                                                                                                                                                                                                                                                                                                                                                                                                                                                                                                                                                                                                                                                                                                                                                                                                                   |
| Secondary Subject Heading:      | Health services research, Pharmacology and therapeutics                                                                                                                                                                                                                                                                                                                                                                                                                                                                                                                                                                                                                                                                                                                                                                                                                                                                                                                  |
| Keywords:                       | COMPLEMENTARY MEDICINE, PAIN MANAGEMENT, QUALITATIVE RESEARCH, STATISTICS & RESEARCH METHODS, Clinical trials < THERAPEUTICS                                                                                                                                                                                                                                                                                                                                                                                                                                                                                                                                                                                                                                                                                                                                                                                                                                             |
|                                 |                                                                                                                                                                                                                                                                                                                                                                                                                                                                                                                                                                                                                                                                                                                                                                                                                                                                                                                                                                          |

SCHOLARONE™  
Manuscripts

1  
2  
3 **Efficacy of mecobalamin (vitamin B12) in the treatment of long-term**  
4 **pain in women diagnosed with fibromyalgia: protocol for a randomized,**  
5 **placebo-controlled trial**  
6  
7  
8  
9

10 Karin Säll Hansson <sup>1 2</sup>  
11 RN, MScN, lecturer, Department of Health and Caring Sciences, Linnaeus  
12 University Växjö, Sweden  
13

14 Gunilla Lindqvist <sup>1 2</sup>  
15 RN, PhD, Senior lecturer, Department of Health and Caring Sciences,  
16 Linnaeus University, Växjö, Sweden.  
17  
18

19 Kent Stening <sup>1 2</sup>  
20 RN, PhD, Senior lecturer, Department of Health and Caring Sciences,  
21 Linnaeus University, Kalmar, Sweden  
22  
23

24 Jan Fohlman <sup>1 2</sup>  
25 MD, PhD, Associate Professor, Region Kronoberg, Sweden  
26  
27

28 Anna Wojanowski <sup>1 2</sup>  
29 MD, Region Kronoberg, Sweden  
30  
31

32 Moa Pontén, <sup>3</sup>  
33 MSc, Doctoral student, Department of Clinical Neuroscience, Karolinska  
34 Institutet, Sweden  
35

36 Karin Jensen, <sup>3</sup>  
37 Associate Professor, Department of Clinical Neuroscience, Karolinska  
38 Institutet, Sweden  
39

40 Björn Gerdle, <sup>4</sup>  
41 MD, PhD, Professor emeritus, Department of Health, Medicine and Caring  
42 Sciences, Linköping University, Linköping, Sweden  
43  
44

45 Carina Elmqvist, <sup>1 2</sup>  
46 RN, PhD, Associate Professor, Department of Health and Caring Sciences,  
47 Linnaeus University, Växjö, Head of Research, Region Kronoberg, Sweden  
48

49 <sup>1</sup>Pain Research group, Linnaeus University

50 <sup>2</sup>Centre of Interprofessional Collaboration within Emergency care (CICE),  
51 Linnaeus university

52 <sup>3</sup>Neuroimagine lab, Karolinska Institute

53 <sup>4</sup>Pain and Rehabilitation Center, Linköping, Sweden  
54  
55

56 Correspondence to:

57 Carina Elmqvist

58 Department of Health and Caring Sciences, Linnaeus University, Växjö,  
59  
60

1  
2  
3 Head of Research, Region Kronoberg, Sweden  
4 [carina.elmqvist@lnu.se](mailto:carina.elmqvist@lnu.se)  
5  
6

## 7 **ABSTRACT**

### 8 **Introduction**

9  
10 Fibromyalgia causes long-term pain. It affects at least 2% of the population,  
11 the majority being women. In addition, extended symptoms corresponding to  
12 vitamin B12 deficiency occur. Findings from several studies have indicated  
13 that vitamin B12 may be a possible treatment for pain in fibromyalgia. The  
14 aim of the proposed study is to evaluate whether vitamin B12 decreases pain  
15 sensitivity and the experience of pain (i.e. hyperalgesia and allodynia) in  
16 women with fibromyalgia.  
17  
18  
19  
20  
21  
22

### 23 **Methods and analysis**

24  
25 The study is a randomized, placebo-controlled, single-blind, clinical trial  
26 with two parallel groups who are administered mecobalamin (vitamin B12)  
27 or placebo over 12 weeks. 40 Swedish women aged 20-70 years with an  
28 earlier recorded diagnosis of fibromyalgia are randomized into the placebo  
29 group or the treatment group, each consisting of 20 participants. Outcomes  
30 consist of questionnaires measured at baseline and after 12 weeks of  
31 treatment. A final re-evaluation will then follow 12 weeks after treatment  
32 ends. The primary outcome is tolerance time, maximised to three minutes,  
33 which is assessed using the Cold Pressor Test. In order to broaden the  
34 understanding of the lived experience of participants, qualitative interviews  
35 will be conducted using a phenomenological approach on a life-world  
36 theoretical basis (Reflective Lifeworld Research approach).  
37  
38  
39  
40  
41  
42  
43  
44  
45  
46  
47

### 48 **Ethics and dissemination**

49  
50 The protocol for the study is approved by the local ethical committee at  
51 Linköping (EPM); 2018/294-31 (Appendix 2019-00347; 2020-04482). The  
52 principles of the Helsinki Declaration are followed regarding oral and written  
53 consent to participate, confidentiality and the possibility to withdraw  
54 participation in the study at any time. The results will primarily be  
55 communicated through peer-reviewed journals and conferences.  
56  
57  
58  
59  
60

**Trial registration numbers:** EudraCT, 2015-005086-23 (Appendix 5.1-2020-71076), protocol no 2020-08-17 version 5.0; ClinicalTrials.gov, NCT05008042.

**Keywords:** Fibromyalgia, Cobalamin, Chronic pain, Mekoalamin, Randomized controlled trial, Vitamin B12

### **STRENGTHS AND LIMITATIONS OF THIS STUDY**

- The study design is a randomized, placebo-controlled, single-blind clinical trial using parallel groups.
- The trial is a collaboration between different universities and regions.
- A possible limitation is the low number of participants; however, the study continues until 20 participants per group have been included and completed the study, which exceeds the minimum number of 16 determined in our power calculation.
- Another possible limitation is heterogeneity of fibromyalgia spectrum.
- Another possible limitation is the placebo effects of parenteral injection; however, the participants are individually randomized to intervention or control group (placebo) in 1:1 allocation ratio.

### **INTRODUCTION**

Fibromyalgia causes long-term pain and affects at least 2% of the population, 80% of the sufferers being women (1). Treatment options are scarce and patients with fibromyalgia have experienced being discredited and invalidated by the health-care system (2). Fibromyalgia is characterized by long-term widespread musculoskeletal pain and generalized hyperalgesia. This is often accompanied by fatigue, concentration problems and sleep problems (3).

Fibromyalgia pain is currently classified as nociplastic, which means that pain arises from altered regulation of pain signals, in absence of tissue damage (4). No definite pathophysiology has been established for fibromyalgia. Imaging techniques have challenged previous ideas about the



1  
2  
3 peripheral origin of FM and have provided evidence for altered central  
4 nervous system (CNS) nociceptive/pain processing and morphology in  
5 fibromyalgia. Furthermore, recent studies report both central alterations and  
6 peripheral alterations (e.g., systemic low-grade inflammation and  
7 nociceptor/muscle alterations) (5-9)

8  
9  
10  
11  
12  
13  
14  
15  
16  
17  
18  
19  
20  
21  
22  
23  
24  
25  
26  
27  
28  
29  
30  
31  
32  
33  
34  
35  
36  
37  
38  
39  
40  
41  
42  
43  
44  
45  
46  
47  
48  
49  
50  
51  
52  
53  
54  
55  
56  
57  
58  
59  
60

Current treatment for fibromyalgia includes both non-pharmacological and pharmacological interventions, depending on the key symptoms and the extent of disability. The recommended pharmacological treatments for fibromyalgia are antidepressants (e.g. SNRI) and antiepileptics (e.g. gabapentinoids), which often cause side effects (4). In addition, opioid analgetics and NSAID/COX are often prescribed (10). Only a minority of individuals report a clinically relevant improvement from any of the treatments (11).

Vitamin B12 is sometimes used for symptoms other than those of vitamin B12 deficiency e.g., different pain conditions such as backpain and neuropathic pain (12-16). Vitamin B12 nasal drops have been tested with positive results on patients with ME/CF/fibromyalgia (myalgic encephalomyelitis/chronic fatigue syndrome) (17). A recent study showed that sublingual vitamin B12 had positive effect on patients with fibromyalgia (18).

In addition, there are vitamin B12 studies that have shown good results in the therapy of aphthous ulcers (19) and acute lumbago (20) as well as in studies concerning diabetic polyneuropathy (21, 22). Moreover, studies examining methylcobalamin treatment in patients with lower back pain showed pain reduction and functionality gain (13, 23).

To summarize, it is not entirely clear how vitamin B12 affects the human pain system. However, several studies indicate that it may be a possible treatment in fibromyalgia.

### **Aim and objectives**

The aim of this study is to evaluate the effect of mecobalamin (vitamin B12), and describe lived experiences of pain, health, suffering and well-being in women with diagnosed fibromyalgia.

The primary objective is to evaluate whether mecobalamin (vitamin B12) given as an intramuscular injection once/week for 12 weeks compared to placebo reduces pain sensitivity i.e. tolerance time (Cold Pressor Test).

The secondary objective is to evaluate whether intramuscular mecobalamin (vitamin B12) compared to placebo reduces pain intensity and pressure pain threshold (Numeric rating scale NRS, Pressure Algometry), increases activity level (questionnaire), quality of life (questionnaire) and perceived effect of given drug (questionnaire). Furthermore, the ratings of expected effects of a given drug (NRS), the desire for pain relief (NRS) and estimated pain variability (NRS) are evaluated. Qualitative interviews that describe how women with fibromyalgia experience pain, health, suffering and well-being (interviews) will be conducted.

## METHODS AND ANALYSIS

### Study design

The study is an academic randomized, placebo-controlled, single-blind clinical trial using parallel groups. Participants are individually randomized to intervention or control group (placebo) in 1:1 allocation. In order to broaden and deepen the understanding of the lived experience, an interview will be conducted applying a phenomenological approach on a life-world theoretical basis, Reflective Lifeworld Research approach (RLR) (24).

### Study setting and sample

Swedish women aged 20-70 years with an earlier recorded diagnosed fibromyalgia. Detailed eligibility criteria are presented in Table 1.

**Table 1.** Inclusion and exclusion criteria

| Inclusion criteria:                                                                                                                                                                                                                           | Exclusion criteria:                                                                                                                                                                                                                                               |
|-----------------------------------------------------------------------------------------------------------------------------------------------------------------------------------------------------------------------------------------------|-------------------------------------------------------------------------------------------------------------------------------------------------------------------------------------------------------------------------------------------------------------------|
| <ul style="list-style-type: none"> <li>- Diagnosis of fibromyalgia</li> <li>- Women aged 20-70 years</li> <li>- Swedish-speaking</li> <li>- Safe method of contraception</li> <li>- Cobalamin value &gt;250 pmol/L &lt; 800 pmol/L</li> </ul> | <ul style="list-style-type: none"> <li>- Previous treatment with B12</li> <li>- Known hypersensitivity to the active substance mecobalamin or an additive</li> <li>- Neuroleptic treatment</li> <li>- Reynaud's phenomenon</li> <li>- Known neuropathy</li> </ul> |

|                                                                                                                                                                                                                                                                                                                                                                                                                   |                                                                                                                                                                                                                   |
|-------------------------------------------------------------------------------------------------------------------------------------------------------------------------------------------------------------------------------------------------------------------------------------------------------------------------------------------------------------------------------------------------------------------|-------------------------------------------------------------------------------------------------------------------------------------------------------------------------------------------------------------------|
| <ul style="list-style-type: none"> <li>- Kidney function value (relatively) GFR &gt;60 mL/min/1.73 m<sup>2</sup></li> <li>- Liver function value P-ALP 0.6-2.85 µkat/L</li> <li>P-ALAT 0.15-1.13 µkat/L</li> <li>- Heart function value Troponin-T &lt; 15 ng/L</li> <li>NT-pro-BNP &lt; 60 years &lt;125 ng/L</li> <li>NT-pro-BNP &gt; 60 years &lt; 300 ng/L</li> <li>- Given consent to participate</li> </ul> | <ul style="list-style-type: none"> <li>- Vegan as veganism can lead to B12 deficiency</li> <li>- Known heart, kidney or liver disease</li> <li>- Breastfeeding</li> <li>- Planned or ongoing pregnancy</li> </ul> |
|-------------------------------------------------------------------------------------------------------------------------------------------------------------------------------------------------------------------------------------------------------------------------------------------------------------------------------------------------------------------------------------------------------------------|-------------------------------------------------------------------------------------------------------------------------------------------------------------------------------------------------------------------|

The participants are recruited via advertising in the local newspaper Facebook, YouTube, Fibromyalgia Association, posters at Linnaeus University, hospitals and healthcare centres. The prospective participant contacts the Trial Manager via telephone or email and receives oral information. Written information and consent form (Supplemental File) are sent to the participant who contacts the Trial Manager for an appointment.

### Intervention and placebo

The active substance of vitamin B12 given in the study is 2ml mecobalamin (5mg/ml) intramuscularly (25). Placebo substance is 2 ml Sodium Chloride (9 mg/ml), isotonic solution for parenteral use (Baxter) intramuscularly (26). All participants are informed that their urine may turn red, which may occur during mecobalamin injections.

### Measurements

At the first measurement opportunity, the trial manager and co-examiner 1 carefully follow inclusion and exclusion criteria. Oral information is given again, and consent is signed by the participant and by the co-examiner 1. First, the participant answers two questionnaires Short-form McGill Pain Questionnaire (MPQ) (27) and RAND 36 (28), then stimulation tests (Cold Pressor Test, pressure algometry) (29 - 33) are performed followed by pain rating (NRS) (34) immediately, after one minute and after three minutes.

1  
2  
3 Finally, blood samples for cobalamin (vitamin B12), kidney, liver and heart  
4 markers are taken. The participant provides an information card about the  
5 study's design, purpose, treatment options and contacts with telephone  
6 numbers. The participant is asked about interest in an interview in connection  
7 with the final measurement opportunity. Co-examiner 2 assesses the blood  
8 samples and approves final inclusion. If tests deviate from accepted reference  
9 values, the participant is excluded and encouraged to seek medical attention.  
10 After approved inclusion, an independent chief examiner performs the  
11 randomisation. The participant then receives intramuscular injections of the  
12 active substance or placebo, once a week for 12 weeks, given by a registered  
13 nurse. Before each injection the participant answers questions in which they  
14 estimate their expected effects of a given drug, desire for pain relief and  
15 average pain intensity during the past week (NRS). The participant has the  
16 opportunity to postpone the visit  $\pm$  3 days, for example in case of illness or  
17 travelling and may miss a maximum of two injections in order to follow per-  
18 protocol analysis. Even if the participant is not compliant with the study  
19 protocol, the participant may retain the treatment regime for the duration of  
20 the study and be analysed in the main intention-to-treat analysis.  
21  
22  
23  
24  
25  
26  
27  
28  
29  
30  
31  
32  
33

34 The second measurement takes place after 12 weeks of  
35 intervention and three questionnaires (MPQ, RAND 36) and (Patient Global  
36 Impression of Change PGIC) (35) are filled out. The stimulation tests Cold  
37 Pressor Test and pressure algometry are performed as well as blood sampling  
38 of cobalamin/p (vitamin B12). In cases of low cobalamin/p, the participant is  
39 encouraged to seek medical attention but is still included in the study.  
40  
41  
42  
43  
44

45 At the third measurement, which takes place 12 weeks after the  
46 end of the intervention, the participant fills in questionnaires (MPQ, RAND-  
47 36 and PGIC), undergoes stimulation tests (Cold Pressor Test and pressure  
48 algometry), blood sampling of cobalamin/p (vitamin B12) together with an  
49 interview. If cobalamin/p on this occasion shows that the participant has a  
50 low cobalamin value, the participant is encouraged to seek medical attention.  
51 For the individual participant, the study ends after six months. An overview  
52 of the study flow is presented in Figure 1.  
53  
54  
55  
56  
57  
58  
59  
60

## Outcomes

1  
2  
3 The primary outcome is:  
4

- 5 • Tolerance time, maximised to three minutes, which is tested using the  
6 Cold Pressor Test.  
7

8  
9 The secondary outcome are:  
10

- 11 • Pain experience measured by a pressure algometry test performed on  
12 the shoulder, hip, knee and elbow.  
13
- 14 • Possible pain change measured by a pressure algometry test  
15 performed on the shoulder, hip, knee and elbow.  
16
- 17 • Subjective experience of pain measured using Numeric Rating Scale  
18 (NRS) 0-10 where 0 is the best outcome.  
19
- 20 • Possible pain change measured using Numeric Rating Scale (NRS) 0-  
21 10 where 0 is the best outcome.  
22
- 23 • Ratings of expectation, desire for relief, using Numeric Rating Scale  
24 (NRS) 0-10 where 0 is the best outcome.  
25
- 26 • Ratings of expectation, pain variability, using Numeric Rating Scale  
27 (NRS) 0-10 where 0 is the best outcome.  
28
- 29 • Activity level are assessed using questionnaire McGills Pain  
30 Questionnaire (MPQ). Short version score 0-45.  
31
- 32 • Quality of life are assessed using questionnaires RAND-36 score 0-  
33 100.  
34
- 35 • Experience of the effect of the drug, assessed using questionnaire  
36 Patients' Global Impression of Change (PGIC) score 1-7.  
37
- 38 • Control of vitamin B12 is done by measuring cobalamin in plasma.  
39
- 40 • Qualitative in-depth interviews will be conducted to capture women's  
41 lived experiences of pain, health, suffering and well-being.  
42  
43  
44  
45  
46  
47  
48  
49

50  
51 Cold Pressor Test

52 The Cold Pressor Test (29-31) is measured in number of seconds the  
53 participant leaves her hand in the low-temperature water of five degrees.  
54 Evaluation variables from Cold Pressor Test become pain threshold (when it  
55 starts to hurt) and tolerance time, i.e. how long the participant endures the  
56  
57  
58  
59  
60

1  
2  
3 pain. Participants end the test by raising their hands when they can no longer  
4 stand it or when the set end time of three minutes has elapsed.  
5  
6  
7

#### 8 Pressure algometry test

9  
10 The pressure algometry test (32, 33) generates a mechanical pressure against  
11 specific points on the body; trapezius (shoulder), epicondyle (elbow), gluteal  
12 (outside the gluteal muscles) and medial knee (inside of the knee) which are  
13 all accepted in the diagnosis of fibromyalgia. Pressure algometry tests are  
14 measured in kilopascal (kPa). The Trial Manager interrupts the mechanical  
15 pressure when the participant expresses pain.  
16  
17  
18  
19  
20  
21

#### 22 Numeric rating scale (NRS)

23  
24 Participants rate their pain intensity on NRS (34) in connection with the Cold  
25 Pressor Test when the participant takes her hand from the water, after one  
26 minute and finally after three minutes. Participants estimate their pain  
27 intensity on a scale (NRS) from 0-10, where 0 corresponds to no pain at all  
28 and 10 worst possible pain. Pain rating is measured in the same way after the  
29 pressure algometry test.  
30  
31  
32  
33

34 The influence of expectation, desire for pain relief, and pain  
35 variability will be measured before each injection using the same numeric  
36 rating scale as used for pain ratings. Ratings of expected pain levels will be  
37 obtained by asking patients “What level of pain do you expect when this  
38 treatment starts to have an effect?” The NRS scale is anchored at the left by  
39 the descriptors ‘no pain sensation’ and at the right by ‘the most pain  
40 sensation imaginable’. Ratings of desired pain relief will be obtained by  
41 asking patients “How strong is your desire for pain relief? The question will  
42 be anchored by the descriptors ‘0=No desire for pain relief’ and ‘10=the most  
43 intense desire for pain relief imaginable’. Ratings of pain variability will be  
44 obtained by asking participants their average pain intensity that week. These  
45 scales have been validated and used in previous studies (36-40).  
46  
47  
48  
49  
50  
51  
52  
53  
54  
55

#### 56 Short-form McGill Pain Questionnaire (MPQ)

57  
58 In this study MPQ Short form of 15 questions (27) is used which  
59 distinguishes between the sensory-discriminatory and the affective and  
60

1  
2  
3 emotional aspects of the pain experience. Participants are asked to estimate  
4 their pain intensity and describe their pain in predetermined words. They fill  
5 in MPQ on all three measurement occasions.  
6  
7  
8  
9

### 10 RAND-36

11  
12 RAND-36 is a quality-of-life instrument (28) that aims to measure health-  
13 related quality of life, i.e. physical, mental and social well-being, not just the  
14 absence of illness. The estimation instrument consists of 36 questions of  
15 various kinds, e.g. on general health, activity, physical health, emotional  
16 problems and pain. RAND-36 is filled in by the participant on all three  
17 measurement occasions.  
18  
19  
20  
21  
22  
23  
24

### 25 Patient Global Impression of Change (PGIC)

26 PGIC (35) evaluates participants' experience of the treatment i.e. the  
27 substance given. Participants tick the box that most closely describes the  
28 change that they are experiencing. The PGIC is completed by the participant  
29 after the injection treatment has been concluded at 12 weeks and at the  
30 follow-up 12 weeks later. PGIC is directly translated in its entirety from  
31 English by the research group.  
32  
33  
34  
35  
36  
37  
38

### 39 Cobalamin/p

40 Cobalamin/p levels are taken on three occasions. The first measurement,  
41 baseline rule out a vitamin B12 deficiency (according to the accepted  
42 reference values). A second measurement is performed at 12 weeks on  
43 completion of treatment in order to monitor the participants' level of  
44 cobalamin/p just after the end of the injection treatment. The final  
45 measurement is 12 weeks after the end of intervention.  
46  
47  
48  
49  
50  
51

### 52 Qualitative in-depth interview

53  
54 In order to obtain a deeper understanding of women's perceived experiences,  
55 in-depth interviews with both compliant and non-compliant participants from  
56 both groups will be performed in connection with the third measurement  
57 session. The aim is to describe the women's lived experiences of pain,  
58  
59  
60

1  
2  
3 health, suffering and well-being. The interviews will be conducted by the  
4 Trial Manager, recorded, transcribed and later analysed using a reflective life  
5 world approach (RLR) (24).  
6  
7  
8  
9

### 10 **Sample size**

11 In order to obtain an adequate sample size, a power analysis was performed  
12 based on results from a previously published study (29) in which women  
13 with fibromyalgia underwent the same stimulation procedure with the Cold  
14 Pressor Test. Account is taken here of the standard deviation shown and  
15 compensation for any placebo effects. Based on these results, the expected  
16 effect difference is estimated at 20 seconds with a standard deviation of 20  
17 seconds between the two groups after 12 weeks of treatment with  
18 mecobalamin (vitamin B12)/placebo. Using a two-sided  
19 t-test for two independent groups, with a power of 80% and 5% significance  
20 level, it was calculated that each group would consist of 16 participants. In  
21 order to compensate for any loss, 20 participants per group are therefore  
22 included. The study continues until 40 participants have been included and  
23 completed the study.  
24  
25  
26  
27  
28  
29  
30  
31  
32  
33  
34  
35

### 36 **Randomization and allocation concealment**

37 Participants are randomized into two groups, the placebo group or the  
38 treatment group, each consisting of 20 participants either receiving  
39 mecobalamin (vitamin B12) or placebo. An independent statistician  
40 generates a randomisation list by random distribution of processing in blocks  
41 (1:1) in a computerised statistics program (STATA). Participants are  
42 randomized according to the list by the chief examiner opening closed  
43 randomisation envelopes in consecutive order. Based on each randomisation  
44 envelope, the chief examiner registers in and signs the injection retrieval  
45 protocol as to which substance the participant will receive. The participants'  
46 randomisation number is recorded in the journal. Only the chief examiner has  
47 access to randomisation envelopes and injection retrieval protocols which are  
48 kept locked.  
49  
50  
51  
52  
53  
54  
55  
56  
57

58 When the third measurement session has been completed, the  
59 trial manager contacts the chief examiner who has the randomisation list.  
60



1  
2  
3 The chief examiner breaks the code and notifies the participant with a letter  
4 of given treatment. The code is broken at this time because it cannot be  
5 considered ethical that the participant does not find out about the treatment  
6 given, especially if the participant believes that the treatment has helped. If  
7 the participant has received mecobalamin and wishes to continue, they are  
8 recommended to contact their health centre for continued mecobalamin  
9 treatment. The letter will contain the contact information of the trial manager  
10 and the chief examiner if the health centre doctor wishes to contact them.  
11  
12 The trial manager is still unaware of what the individual participant received  
13 until the study is completed. If the code needs to be broken for an individual  
14 participant before the third measurement session has been completed, there is  
15 a code breaking envelope that may be used by the chief examiner in cases of  
16 emergency.  
17  
18  
19  
20  
21  
22  
23  
24  
25  
26  
27

### 28 **Adverse events (AEs) and serious adverse events (SAEs)**

29 AEs are defined as any unfavourable or unintended reaction occurring in a  
30 research person during the course of the study and where investigational  
31 medicinal products have been administered, regardless of dose. Any AE will  
32 be reported from day 1 of the study at each visit to the clinic and until the last  
33 visit made 24 weeks after the start of the study. All SAEs that occur during  
34 the course of the study will be reported to the sponsor within 24 hours of the  
35 research staff becoming aware of the incident. During the study, an annual  
36 safety report from the sponsor and responsible investigator is sent in to both  
37 the Swedish Medical Products Agency and the Regional Ethical Review  
38 Board.  
39  
40  
41  
42  
43  
44  
45  
46  
47

### 48 **Statistical methods**

49 The primary endpoint is tolerance time at Cold Pressor Test and it will be  
50 calculated on the difference between the two groups after 12 weeks and will  
51 be analysed by ANOVA. Pain thresholds measured by pressure algometry  
52 test (Somedic) will be analysed using: t-test, ANOVA, similar to the primary  
53 variable. Questionnaires (MPQ, RAND-36, and PGIC) will be analysed  
54 using Mann-Whitney tests. In cases of minor loss, (less than 10%), a mixed  
55 model can be used as an alternative to t-test and ANOVA with repeated  
56  
57  
58  
59  
60

1  
2  
3 measurement. For variables with more than 10% loss, imputation of data will  
4 be used. Drop-out participants will be described in a specific analysis.  
5 Rejection analysis will be performed on the participants who interrupt the  
6 study prematurely.  
7  
8  
9

10 Results will be reported for both intention-to-treat and per-  
11 protocol analyses. Intention-to-treat is defined as the participant is placed in  
12 the treatment group she had been randomized to. Per-protocol is defined as  
13 the participant is placed in the treatment group she de facto received and  
14 carried out without significant protocol deviations. The per-protocol results  
15 will be presented as sensitivity analyses. The participant may miss a  
16 maximum of two injections.  
17  
18  
19  
20  
21

22 Self-reported ratings of desired and expected treatment  
23 outcome pre and post treatment will be implemented in linear regression  
24 models to predict any of the outcome measures. Repeated ratings of desired  
25 treatment outcome, expected treatment outcome and pain variability will be  
26 calculated as each participant's standard deviation from the repeated ratings  
27 and implemented in a linear regression model to predict possible outcome  
28 measures.  
29  
30  
31  
32  
33  
34  
35

### 36 **Patient and public involvement**

37 None.  
38  
39  
40

### 41 **ETHICS AND DISSEMINATION**

42 The study is registered at the Swedish Medical Products Agency, EudraCT-  
43 no 2015-005086-23 (Appendix 5.1-2020-71076), protocol no 2020-08-17  
44 version 5.0 and ClinicalTrials.gov (NCT05008042). The trial was approved  
45 by the local ethical committee at Linköping (EPM); 2018/294-31 (Appendix  
46 2019-00347; 2020-04482). The principles of the Helsinki Declaration (2013)  
47 (41) are followed regarding oral and written consent to participate,  
48 confidentiality and the possibility to withdraw participation in the study at  
49 any time. Good Clinical Practice (GCP) is followed, with independent  
50 regular monitoring by Forum Ostergotland, Linköpings University, including  
51 plans for communicating important protocol modifications. The data will be  
52 placed in a locked cabinet at the university until the study is completed and  
53  
54  
55  
56  
57  
58  
59  
60

1  
2  
3 the data is to be processed and analysed. Only involved researchers have  
4 access to data when it is to be analysed; however, anyone requesting  
5 metadata can access the data during 2025-2035. The study started on  
6 February 6<sup>th</sup>, 2019, but recruitment was delayed due to the COVID-19  
7 pandemic. Final recruitment is expected to be completed in 2024. The results  
8 will primarily be communicated through peer-reviewed journals and  
9 conferences.  
10  
11  
12  
13  
14

15  
16  
17 \*\*\* \*\*

### 18 19 20 **Contributors**

21 KSH (trial manager), GL, KS, JF (chief examiner), MP, KJ, BG and CE  
22 (sponsor) planned the study design and all authors participated in the  
23 production of the analysis plan. KSH, GL, KS, AWo and CE prepared the  
24 first version of the manuscript and all authors participated in reviewing and  
25 drafting the manuscript. All authors have read and approved the final  
26 version.  
27  
28  
29  
30  
31

### 32 33 34 **Competing interests**

35 There are no conflicts of interest to report.  
36  
37  
38

### 39 40 **Funding**

41 This trial was supported by grants from Medical Research Council of  
42 Southeast Sweden no: 479961; 656241; 854911 and Capio Research  
43 Foundation, Sweden no: 2018-3195; 2019-3277. The funding sources had no  
44 involvement in study design, data collection or the writing of this  
45 manuscript.  
46  
47  
48  
49  
50

### 51 52 **Acknowledgements**

53 We thank Co-examiner and Medical Doctors; Anders Willstedt and Bjarne  
54 Sorensen as well as the Registered Nurses Ann-Louise Breider and Lisa  
55 Gunnarsson for their ongoing contributions and support.  
56  
57  
58  
59  
60

**REFERENCES**

1. Heidari F, Afshari M, Moosazadeh M. Prevalence of fibromyalgia in general population and patients, a systematic review and meta-analysis. *Rheumatol Int* 2017;37:1527-39.
2. Säll Hansson K, Fridlund B, Brunt D, *et al.* The meaning of the experiences of persons with chronic pain in their encounter with the health service. *Scand. J. Caring Sci.* 2011;25:444-50.
3. Kosec, E. (2019). *Physiology of pain and regulation*. In Kosec E, Lampa L, Nisell R. (Red.), *Pain and inflammation*. Lund: Studentlitteratur.
4. Kosec E, Cohen M, Baron R, *et al.* Do we need a third mechanistic descriptor for chronic pain states? *Pain*, 2016;157:1382–6.
5. Jensen KB, Kosec E, Petzke F, *et al.* "Evidence of dysfunctional pain inhibition in Fibromyalgia reflected in rACC during provoked pain." *Pain*, 2009;144(1-2): 95-100.
6. Sluka KA, Clauw DJ. "Neurobiology of fibromyalgia and chronic widespread pain." *Neuroscience*, 2016;338:114-129.
7. Gerdle B, Larsson B. (2018). Muscle. Fibromyalgia syndrome and widespread pain – from construction to relevant recognition. In: Häuser W and Perrot S. Philadelphia, Wolters Kluwer: 215- 231.
8. Üçeyler N, Sommer C. (2018). Small nerve fiber pathology. Fibromyalgia syndrome and widespread pain - from construction to relevant recognition. In: Häuser W and Perrot S. Philadelphia, Wolters Kluwer: 204-214.
9. Albrecht DS, Forsberg A, Sandstrom A, *et al.* "Brain glial activation in fibromyalgia - A multi-site positron emission tomography investigation." *Brain Behav Immun* 2019;75:72-83.

10. Werner M. (2019) *Pharmacology*. In Werner M, Bäckryd E. (Red.), Acute and cancer related pain. Pain medicine vol 1. Stockholm Liber.
11. Moore RA, Fisher E, Häuser W, *et al*. Pharmacological therapies for fibromyalgia (fibromyalgia syndrome) in adults - an overview of Cochrane Reviews. *Cochrane Database of Systematic Reviews*, 2021; (8).
12. Ming Z, Wenjuan H, Sanjue H, *et al*. Methylcobalamin: A potential Vitamin of Pain Killer. *Neural Plast*, 2013; 2013:424651.
13. Chiu CK, Low TH, Tey YS, *et al*. The efficacy and safety of intramuscular injections of methylcobalamin in patients with chronic nonspecific low back pain: a randomized controlled trial. *SMJ*, 2011; 52 (12): 868-73.
14. Jurna I. Analgesic and analgesia-potentiating action of B vitamins. *Schmerz*, 1998;20;12(2):136-41.
15. Yu CZ, Liu YP, Lui S, *et al*. Systematic administration of B vitamins attenuates neuropathic hyperalgesia and reduces spinal neuron injury following temporary spinal cord ischemia in rats. *Eur J Pain*, Jan; 2014;18(1):76-85.
16. Julian T, Syeed R, Glasgow N, *et al*. B12 as a treatment for Peripheral Neurophatic Pain; A Systematic Review. *Nutrients*, 2020;12(8):2221.
17. MC van Campen L, Riepma K, Visser FC. Open Trial of Vitamin B12 Nasal Drops in Adults With Myalgic Encephalomyelitis/Chronic Fatigue Syndrome: Comparison of Responders and Non-Responders. *Front Pharmacol*. 2019;20(10):1102

1  
2  
3 18. Gharibpoor F, Gavidel-Parsa B, Sattari N, *et al.* Effect of vitamin B12 on  
4 the symptom severity and psychological profile of fibromyalgia patients; a  
5 prospective pre-post study.  
6  
7

8 *BMC Rheuma.* 2022;51(6).  
9

10  
11 19. Liu HL, Chiu SC. The effectiveness of vitamin B12 for relieving pain in  
12 aphthous ulcers: a randomized, double-blind, placebo controlled trial. *Pain*  
13 *Manag Nurs.* 2015;16(3):182-187.  
14  
15

16  
17 20. Mibielli MA, Geller M, Cohen JC, *et al.* Diclofenac plus B vitamins  
18 versus diclofenac monotherapy in lumbago: the DOLOR study. *Curr Med*  
19 *Res Opin.* 2019;25(11):2589-99.  
20  
21

22  
23 21. Yaqub BA, Saddique A, Sulimani R. Effects of methylcobalamin on  
24 diabetic neuropathy. *Clin Neurol Neurosurg.* 1992;94(2):105-111.  
25  
26

27  
28 22. Fonseca VA, Lavery L, Thethi T, *et al.* Metanx in type 2 diabetes with  
29 peripheral neuropathy: a randomized trial. *Am J Med.* 2013;126(2):141-9.  
30  
31

32  
33 23. Mauro GL, Martorana U, Cataldo P, *et al.* Vitamin B12 in low back pain:  
34 a randomized, double blind, placebo-controlled study. *Eur Rev Pharmacol*  
35 *Sci.* 2000;4(3):53-8.  
36  
37

38  
39 24. Dahlberg K, Dahlberg H, Nyström M. (2008) *Reflective Lifeworld*  
40 *Research.* Lund: Studentlitteratur.  
41  
42

43  
44 25. APL's Summary of Product Characteristics, Product Monograph  
45 Mekobalamin  
46  
47

48 <https://www.apl.se/samhallsuppdraget/aida.html?sv.target=12.1f169aa2173042d75c421c68&sv.12.1f169aa2173042d75c421c68.route=%2Fproduct%2F176%2Fdocument&returnTo=%7B%22route%22%3A%22%2Ftherapyarea%2F5%2Fproducts%22%7D>. (Retrieved 2102125)  
49  
50  
51  
52  
53  
54  
55  
56  
57  
58  
59  
60

1  
2  
3 26. FASS Natriumklorid

4 <https://www.fass.se/LIF/product?userType=0&nplId=19900316000177>

5  
6 (Retrieved 20210225)

7  
8  
9  
10 27. Buckhardt CS, Bjelle A. A Swedish Version of the Short-Form McGill  
11 Pain Questionnaire. *Scand. J. Rheumatol.* 1994;23(2).

12  
13  
14  
15 28. Orwelius L, Nilsson M, Nilsson E, *et al.* The Swedish RAND-36 health  
16 Survey-reliability and responsiveness assessed in patient populations using  
17 Svensson's method for paired ordinal data. *J Patient Rep Outcomes*,  
18 2017;2(1):4.

19  
20  
21  
22 29. Stening K, Eriksson O, Wahren LK, *et al.* Pain sensations to the cold  
23 pressor test in normally menstruating women: comparison with men and  
24 relation to menstrual phase and serum sex steroid levels. *Am. J. Physiol. Cell*  
25 *Physiol.* 2007;293(4).

26  
27  
28  
29 30. Stening KD, Eriksson O, Henriksson KG, *et al.* Hormonal replacement  
30 therapy does not affect self-estimated pain or experimental pain responses  
31 in post-menopausal women suffering fibromyalgia a double-blind,  
32 randomized, placebo-controlled trial. *Rheumatology* 2011;50:544-55.

33  
34  
35  
36 31. Walsh NE, Schoenfeld L, Ramamurthy S, *et al.* Normative model for  
37 cold pressor test. *Am J Phys Med Rehabil* 1989;68:6-11.

38  
39  
40  
41 32. Ficher AA. Pressure algometry over normal muscles. Standard values,  
42 validity and reproducibility of pressure threshold. *Pain* 1987;30:115-126.

43  
44  
45  
46 33. Rolke R, Andrews Campell K, Magerl W, *et al.* Deep pain  
47 threshold in the distal limb of healthy human subjects. *Eur J Pain*  
48 2005;9:39-48.

- 1  
2  
3 34. Numeric Rating Scale (NRS). <https://www.vardhandboken.se/vard-och-behandling/akut-bedomning-och-skattning/smarts kattning-av-akut-och-postoperativ-smarta/smarts kattningsinstrument/> (Retrieved 20220103).  
4  
5  
6  
7  
8  
9
- 10 35. Rampakakis E, Ste-Marie P, Sampalis J, *et al.* Real-life assesment of  
11 the validity of patient global impression of change in fibromyalgia. *RMD*  
12 *Open*, 2015;1(1).  
13  
14  
15
- 16 36. Vase EL, Robinson GM, Verne DN, *et al.* Increased placebo analgesia  
17 over time in irritable bowel syndrome (IBS) patients is associated with desire  
18 and expectation but not endogenous opioid mechanisms. *Pain*,  
19 2005;115:338-47.  
20  
21  
22  
23
- 24 37. Vase EL, Robinson GM, Verne DN, *et al.* The contributions of  
25 suggestion, desire, and expectation to placebo effects in irritable bowel  
26 syndrome patients: An empirical investigation. *Pain*, 2003;105:17-25.  
27  
28  
29  
30
- 31 38. Price DD, Barrell JJ. Some General Laws of Human Emotion -  
32 Interrelationships between Intensities of Desire, Expectation, and Emotional  
33 Feeling. *J Pers*, 1984;52:389-409.  
34  
35  
36  
37  
38
- 39 39. Price DD, Milling LS, Kirsch I, *et al.* An analysis of factors that  
40 contribute to the magnitude of placebo analgesia in an experimental  
41 paradigm. *Pain*, 1999;83:147-56.  
42  
43  
44  
45
- 46 40. Kosek E, Rosen A, Carville S, *et al.* Lower Placebo Responses After  
47 Long- Term Exposure to Fibromyalgia Pain. *J Pain*, 2017;18:835-43.  
48  
49  
50
- 51 41. The Declaration of Helsinki 2013 [https://www.wma.net/policies-  
52 post/wma-declaration-of-helsinki-ethical-principles-for-medical-research-  
53 involving-human-subjects/](https://www.wma.net/policies-post/wma-declaration-of-helsinki-ethical-principles-for-medical-research-involving-human-subjects/) (Retrieved 20220103)  
54  
55  
56  
57  
58  
59  
60

### Figure title



1  
2  
3  
4  
5  
6  
7  
8  
9  
10  
11  
12  
13  
14  
15  
16  
17  
18  
19  
20  
21  
22  
23  
24  
25  
26  
27  
28  
29  
30  
31  
32  
33  
34  
35  
36  
37  
38  
39  
40  
41  
42  
43  
44  
45  
46  
47  
48  
49  
50  
51  
52  
53  
54  
55  
56  
57  
58  
59  
60

**Figure 1.** Flowchart of participants, outcome measures and follow-up points

For peer review only

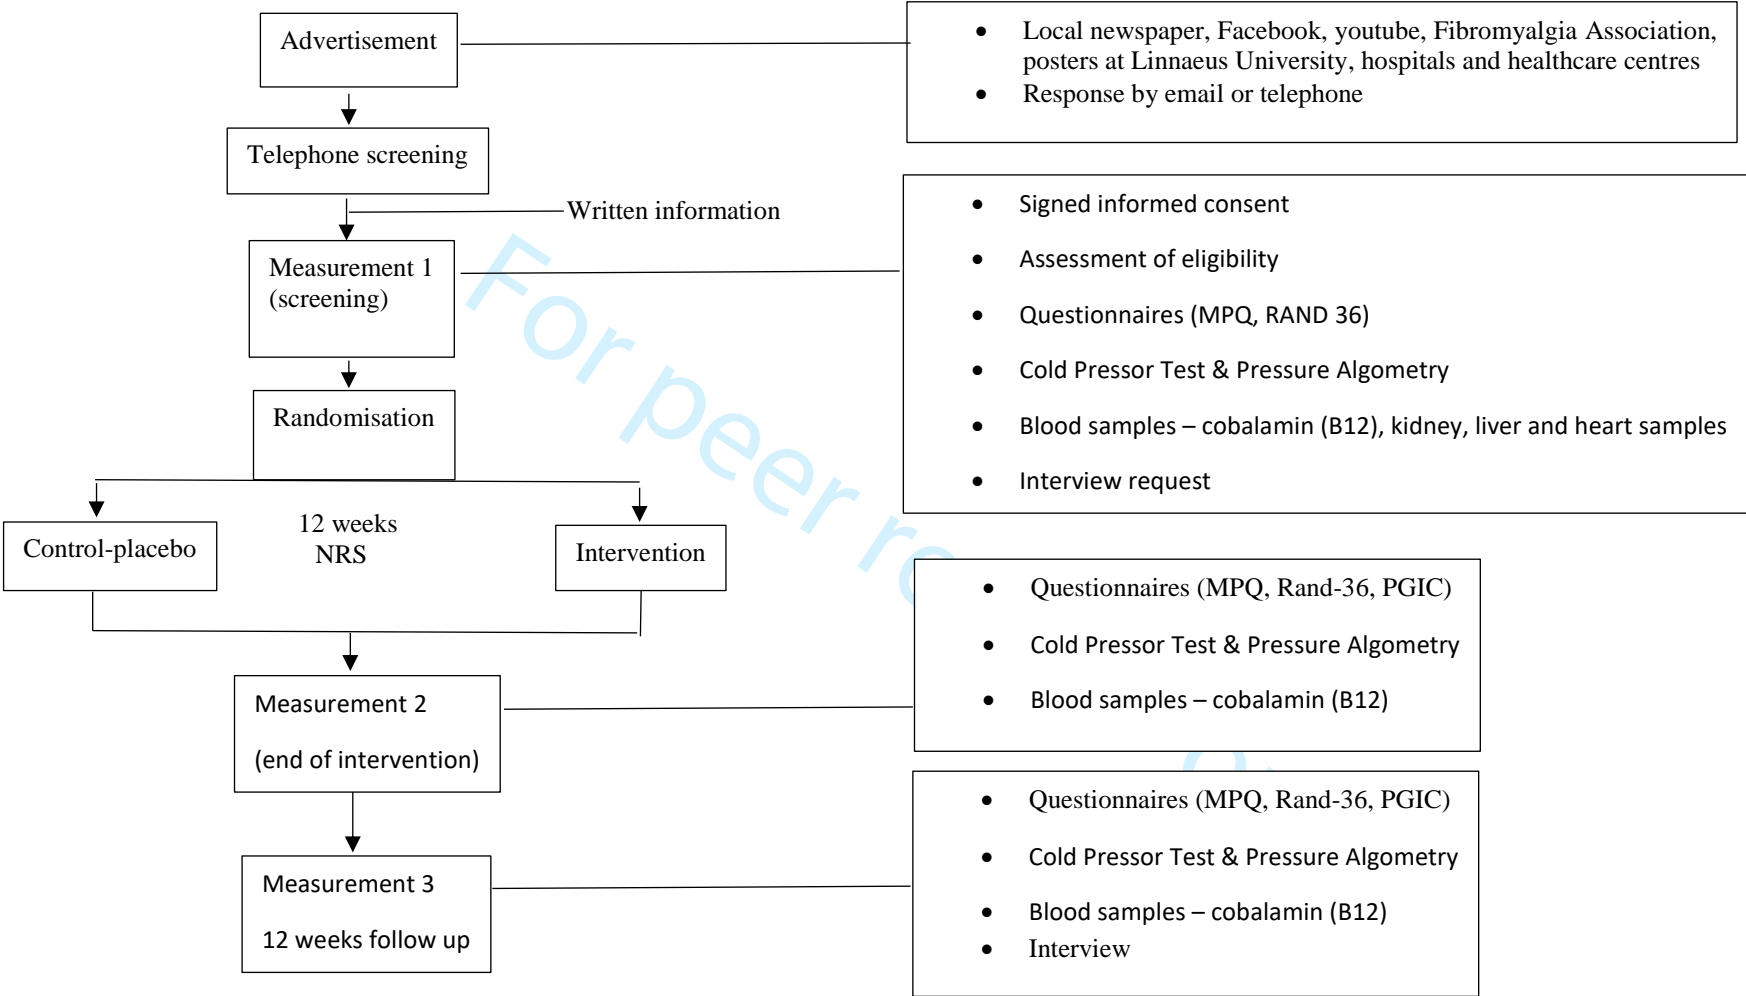

Fig 1. Flowchart of participants, outcome measures and follow-up points

## Participant informed consent form

I have been informed orally about the study and I have read the written information. I have received answers to my questions and I agree to participate in the study. My participation is voluntary, and I am aware that I can withdraw without any explanation and without affecting my future care.

I am informed about my rights to get register extract once a year over collected data. I have been informed about my rights to get false information's arranged or removed from the register. I have been informed about samples taken in the study are handled according to the Biobank Act. I am aware that my sample material will be destroyed after analyses.

## Consent regarding data management

I have received information that personal data collected in the study will be handled confidentially, which means my identity will not be revealed to unauthorized persons.

I allow an independent person and/or authority person, appointed by the study management, to review study information provided customary confidentiality are maintained.

We ask you to confirm your identity at all occasions with legitimation.

.....  
Participants' signature Date (written by participant)

.....  
Name clarification

.....  
Physician signature Date

.....  
Name clarification

Signed copy of the information and consent has been distributed to the participant.

1  
2  
3  
4  
5  
6  
7  
8  
9  
10  
11  
12  
13  
14  
15  
16  
17  
18  
19  
20  
21  
22  
23  
24  
25  
26  
27  
28  
29  
30  
31  
32  
33  
34  
35  
36  
37  
38  
39  
40  
41  
42  
43  
44  
45  
46  
47  
48  
49  
50  
51  
52  
53  
54  
55  
56  
57  
58  
59  
60

For peer review only

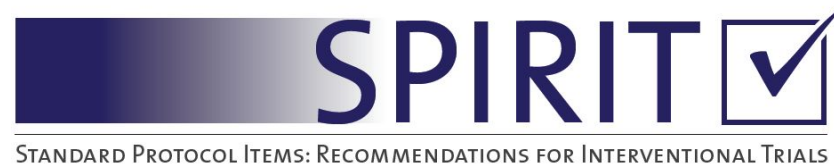

SPIRIT 2013 Checklist: Recommended items to address in a clinical trial protocol and related documents\*

| Section/item                      | Item No | Description                                                                                                                                                                                                                                                                              | Addressed on page number |
|-----------------------------------|---------|------------------------------------------------------------------------------------------------------------------------------------------------------------------------------------------------------------------------------------------------------------------------------------------|--------------------------|
| <b>Administrative information</b> |         |                                                                                                                                                                                                                                                                                          |                          |
| Title                             | 1       | Descriptive title identifying the study design, population, interventions, and, if applicable, trial acronym                                                                                                                                                                             | Page 1                   |
| Trial registration                | 2a      | Trial identifier and registry name. If not yet registered, name of intended registry                                                                                                                                                                                                     | Page 3 and 14            |
|                                   | 2b      | All items from the World Health Organization Trial Registration Data Set                                                                                                                                                                                                                 | _____                    |
| Protocol version                  | 3       | Date and version identifier                                                                                                                                                                                                                                                              | Page 3 and 14            |
| Funding                           | 4       | Sources and types of financial, material, and other support                                                                                                                                                                                                                              | Page 15                  |
| Roles and responsibilities        | 5a      | Names, affiliations, and roles of protocol contributors                                                                                                                                                                                                                                  | Page 15                  |
|                                   | 5b      | Name and contact information for the trial sponsor                                                                                                                                                                                                                                       | Page 1                   |
|                                   | 5c      | Role of study sponsor and funders, if any, in study design; collection, management, analysis, and interpretation of data; writing of the report; and the decision to submit the report for publication, including whether they will have ultimate authority over any of these activities | Page 15                  |
|                                   | 5d      | Composition, roles, and responsibilities of the coordinating centre, steering committee, endpoint adjudication committee, data management team, and other individuals or groups overseeing the trial, if applicable (see Item 21a for data monitoring committee)                         | Page 1 and 15            |

|    |                                                           |     |                                                                                                               |                  |
|----|-----------------------------------------------------------|-----|---------------------------------------------------------------------------------------------------------------|------------------|
| 1  | <b>Introduction</b>                                       |     |                                                                                                               |                  |
| 2  |                                                           |     |                                                                                                               |                  |
| 3  | Background and                                            | 6a  | Description of research question and justification for undertaking the trial, including summary of relevant   | Page 3-5         |
| 4  | rationale                                                 |     | studies (published and unpublished) examining benefits and harms for each intervention                        |                  |
| 5  |                                                           |     |                                                                                                               |                  |
| 6  |                                                           | 6b  | Explanation for choice of comparators                                                                         | _____            |
| 7  |                                                           |     |                                                                                                               |                  |
| 8  | Objectives                                                | 7   | Specific objectives or hypotheses                                                                             | Page 5           |
| 9  |                                                           |     |                                                                                                               |                  |
| 10 | Trial design                                              | 8   | Description of trial design including type of trial (eg, parallel group, crossover, factorial, single group), |                  |
| 11 |                                                           |     | allocation ratio, and framework (eg, superiority, equivalence, noninferiority, exploratory)                   | Page 5           |
| 12 |                                                           |     |                                                                                                               |                  |
| 13 |                                                           |     |                                                                                                               |                  |
| 14 | <b>Methods: Participants, interventions, and outcomes</b> |     |                                                                                                               |                  |
| 15 |                                                           |     |                                                                                                               |                  |
| 16 | Study setting                                             | 9   | Description of study settings (eg, community clinic, academic hospital) and list of countries where data will | Page 6           |
| 17 |                                                           |     | be collected. Reference to where list of study sites can be obtained                                          |                  |
| 18 |                                                           |     |                                                                                                               |                  |
| 19 | Eligibility criteria                                      | 10  | Inclusion and exclusion criteria for participants. If applicable, eligibility criteria for study centres and  | Page 5           |
| 20 |                                                           |     | individuals who will perform the interventions (eg, surgeons, psychotherapists)                               |                  |
| 21 |                                                           |     |                                                                                                               |                  |
| 22 | Interventions                                             | 11a | Interventions for each group with sufficient detail to allow replication, including how and when they will be | Page 6-8         |
| 23 |                                                           |     | administered                                                                                                  |                  |
| 24 |                                                           |     |                                                                                                               |                  |
| 25 |                                                           | 11b | Criteria for discontinuing or modifying allocated interventions for a given trial participant (eg, drug dose  | Page 6-8         |
| 26 |                                                           |     | change in response to harms, participant request, or improving/worsening disease)                             |                  |
| 27 |                                                           |     |                                                                                                               |                  |
| 28 |                                                           | 11c | Strategies to improve adherence to intervention protocols, and any procedures for monitoring adherence        | Page 6-8         |
| 29 |                                                           |     | (eg, drug tablet return, laboratory tests)                                                                    |                  |
| 30 |                                                           |     |                                                                                                               |                  |
| 31 |                                                           | 11d | Relevant concomitant care and interventions that are permitted or prohibited during the trial                 | _____            |
| 32 |                                                           |     |                                                                                                               |                  |
| 33 | Outcomes                                                  | 12  | Primary, secondary, and other outcomes, including the specific measurement variable (eg, systolic blood       | Page 8 - 11      |
| 34 |                                                           |     | pressure), analysis metric (eg, change from baseline, final value, time to event), method of aggregation (eg, |                  |
| 35 |                                                           |     | median, proportion), and time point for each outcome. Explanation of the clinical relevance of chosen         |                  |
| 36 |                                                           |     | efficacy and harm outcomes is strongly recommended                                                            |                  |
| 37 |                                                           |     |                                                                                                               |                  |
| 38 | Participant timeline                                      | 13  | Time schedule of enrolment, interventions (including any run-ins and washouts), assessments, and visits for   | Page 6-8 - fig 1 |
| 39 |                                                           |     | participants. A schematic diagram is highly recommended (see Figure)                                          |                  |
| 40 |                                                           |     |                                                                                                               |                  |
| 41 |                                                           |     |                                                                                                               |                  |
| 42 |                                                           |     |                                                                                                               |                  |
| 43 |                                                           |     |                                                                                                               |                  |
| 44 |                                                           |     |                                                                                                               |                  |
| 45 |                                                           |     |                                                                                                               |                  |
| 46 |                                                           |     |                                                                                                               |                  |

|   |             |    |                                                                                                                                                                                       |         |
|---|-------------|----|---------------------------------------------------------------------------------------------------------------------------------------------------------------------------------------|---------|
| 1 | Sample size | 14 | Estimated number of participants needed to achieve study objectives and how it was determined, including clinical and statistical assumptions supporting any sample size calculations | Page 12 |
| 2 |             |    |                                                                                                                                                                                       |         |
| 3 |             |    |                                                                                                                                                                                       |         |
| 4 | Recruitment | 15 | Strategies for achieving adequate participant enrolment to reach target sample size                                                                                                   | Page 6  |
| 5 |             |    |                                                                                                                                                                                       |         |

## 6 **Methods: Assignment of interventions (for controlled trials)**

### 7 Allocation:

|    |                    |     |                                                                                                                                                                                                                                                                                                                                                          |         |
|----|--------------------|-----|----------------------------------------------------------------------------------------------------------------------------------------------------------------------------------------------------------------------------------------------------------------------------------------------------------------------------------------------------------|---------|
| 8  |                    |     |                                                                                                                                                                                                                                                                                                                                                          |         |
| 9  |                    |     |                                                                                                                                                                                                                                                                                                                                                          |         |
| 10 | Sequence           | 16a | Method of generating the allocation sequence (eg, computer-generated random numbers), and list of any factors for stratification. To reduce predictability of a random sequence, details of any planned restriction (eg, blocking) should be provided in a separate document that is unavailable to those who enrol participants or assign interventions | Page 12 |
| 11 | generation         |     |                                                                                                                                                                                                                                                                                                                                                          |         |
| 12 |                    |     |                                                                                                                                                                                                                                                                                                                                                          |         |
| 13 |                    |     |                                                                                                                                                                                                                                                                                                                                                          |         |
| 14 |                    |     |                                                                                                                                                                                                                                                                                                                                                          |         |
| 15 |                    |     |                                                                                                                                                                                                                                                                                                                                                          |         |
| 16 | Allocation         | 16b | Mechanism of implementing the allocation sequence (eg, central telephone; sequentially numbered, opaque, sealed envelopes), describing any steps to conceal the sequence until interventions are assigned                                                                                                                                                | Page 12 |
| 17 | concealment        |     |                                                                                                                                                                                                                                                                                                                                                          |         |
| 18 | mechanism          |     |                                                                                                                                                                                                                                                                                                                                                          |         |
| 19 |                    |     |                                                                                                                                                                                                                                                                                                                                                          |         |
| 20 | Implementation     | 16c | Who will generate the allocation sequence, who will enrol participants, and who will assign participants to interventions                                                                                                                                                                                                                                | Page 12 |
| 21 |                    |     |                                                                                                                                                                                                                                                                                                                                                          |         |
| 22 |                    |     |                                                                                                                                                                                                                                                                                                                                                          |         |
| 23 |                    |     |                                                                                                                                                                                                                                                                                                                                                          |         |
| 24 | Blinding (masking) | 17a | Who will be blinded after assignment to interventions (eg, trial participants, care providers, outcome assessors, data analysts), and how                                                                                                                                                                                                                | Page 12 |
| 25 |                    |     |                                                                                                                                                                                                                                                                                                                                                          |         |
| 26 |                    |     |                                                                                                                                                                                                                                                                                                                                                          |         |
| 27 |                    | 17b | If blinded, circumstances under which unblinding is permissible, and procedure for revealing a participant's allocated intervention during the trial                                                                                                                                                                                                     | Page 12 |
| 28 |                    |     |                                                                                                                                                                                                                                                                                                                                                          |         |
| 29 |                    |     |                                                                                                                                                                                                                                                                                                                                                          |         |
| 30 |                    |     |                                                                                                                                                                                                                                                                                                                                                          |         |

## 31 **Methods: Data collection, management, and analysis**

|    |                 |     |                                                                                                                                                                                                                                                                                                                                                                                                              |           |
|----|-----------------|-----|--------------------------------------------------------------------------------------------------------------------------------------------------------------------------------------------------------------------------------------------------------------------------------------------------------------------------------------------------------------------------------------------------------------|-----------|
| 32 |                 |     |                                                                                                                                                                                                                                                                                                                                                                                                              |           |
| 33 | Data collection | 18a | Plans for assessment and collection of outcome, baseline, and other trial data, including any related processes to promote data quality (eg, duplicate measurements, training of assessors) and a description of study instruments (eg, questionnaires, laboratory tests) along with their reliability and validity, if known. Reference to where data collection forms can be found, if not in the protocol | Page 9-11 |
| 34 | methods         |     |                                                                                                                                                                                                                                                                                                                                                                                                              |           |
| 35 |                 |     |                                                                                                                                                                                                                                                                                                                                                                                                              |           |
| 36 |                 |     |                                                                                                                                                                                                                                                                                                                                                                                                              |           |
| 37 |                 |     |                                                                                                                                                                                                                                                                                                                                                                                                              |           |
| 38 |                 |     |                                                                                                                                                                                                                                                                                                                                                                                                              |           |
| 39 |                 | 18b | Plans to promote participant retention and complete follow-up, including list of any outcome data to be collected for participants who discontinue or deviate from intervention protocols                                                                                                                                                                                                                    | Page 13   |
| 40 |                 |     |                                                                                                                                                                                                                                                                                                                                                                                                              |           |
| 41 |                 |     |                                                                                                                                                                                                                                                                                                                                                                                                              |           |
| 42 |                 |     |                                                                                                                                                                                                                                                                                                                                                                                                              |           |

|    |                                 |     |                                                                                                                                                                                                                                                                                                                                       |             |
|----|---------------------------------|-----|---------------------------------------------------------------------------------------------------------------------------------------------------------------------------------------------------------------------------------------------------------------------------------------------------------------------------------------|-------------|
| 1  | Data management                 | 19  | Plans for data entry, coding, security, and storage, including any related processes to promote data quality (eg, double data entry; range checks for data values). Reference to where details of data management procedures can be found, if not in the protocol                                                                     | Page 12 -14 |
| 2  |                                 |     |                                                                                                                                                                                                                                                                                                                                       |             |
| 3  |                                 |     |                                                                                                                                                                                                                                                                                                                                       |             |
| 4  |                                 |     |                                                                                                                                                                                                                                                                                                                                       |             |
| 5  | Statistical methods             | 20a | Statistical methods for analysing primary and secondary outcomes. Reference to where other details of the statistical analysis plan can be found, if not in the protocol                                                                                                                                                              | Page 13-14  |
| 6  |                                 |     |                                                                                                                                                                                                                                                                                                                                       |             |
| 7  |                                 |     |                                                                                                                                                                                                                                                                                                                                       |             |
| 8  |                                 | 20b | Methods for any additional analyses (eg, subgroup and adjusted analyses)                                                                                                                                                                                                                                                              | Page 13-14  |
| 9  |                                 |     |                                                                                                                                                                                                                                                                                                                                       |             |
| 10 |                                 | 20c | Definition of analysis population relating to protocol non-adherence (eg, as randomised analysis), and any statistical methods to handle missing data (eg, multiple imputation)                                                                                                                                                       | Page 13-14  |
| 11 |                                 |     |                                                                                                                                                                                                                                                                                                                                       |             |
| 12 |                                 |     |                                                                                                                                                                                                                                                                                                                                       |             |
| 13 |                                 |     |                                                                                                                                                                                                                                                                                                                                       |             |
| 14 | <b>Methods: Monitoring</b>      |     |                                                                                                                                                                                                                                                                                                                                       |             |
| 15 |                                 |     |                                                                                                                                                                                                                                                                                                                                       |             |
| 16 | Data monitoring                 | 21a | Composition of data monitoring committee (DMC); summary of its role and reporting structure; statement of whether it is independent from the sponsor and competing interests; and reference to where further details about its charter can be found, if not in the protocol. Alternatively, an explanation of why a DMC is not needed | Page 14     |
| 17 |                                 |     |                                                                                                                                                                                                                                                                                                                                       |             |
| 18 |                                 |     |                                                                                                                                                                                                                                                                                                                                       |             |
| 19 |                                 |     |                                                                                                                                                                                                                                                                                                                                       |             |
| 20 |                                 |     |                                                                                                                                                                                                                                                                                                                                       |             |
| 21 |                                 |     |                                                                                                                                                                                                                                                                                                                                       |             |
| 22 |                                 | 21b | Description of any interim analyses and stopping guidelines, including who will have access to these interim results and make the final decision to terminate the trial                                                                                                                                                               | _____       |
| 23 |                                 |     |                                                                                                                                                                                                                                                                                                                                       |             |
| 24 |                                 |     |                                                                                                                                                                                                                                                                                                                                       |             |
| 25 | Harms                           | 22  | Plans for collecting, assessing, reporting, and managing solicited and spontaneously reported adverse events and other unintended effects of trial interventions or trial conduct                                                                                                                                                     | Page 13     |
| 26 |                                 |     |                                                                                                                                                                                                                                                                                                                                       |             |
| 27 |                                 |     |                                                                                                                                                                                                                                                                                                                                       |             |
| 28 | Auditing                        | 23  | Frequency and procedures for auditing trial conduct, if any, and whether the process will be independent from investigators and the sponsor                                                                                                                                                                                           | Page 14     |
| 29 |                                 |     |                                                                                                                                                                                                                                                                                                                                       |             |
| 30 |                                 |     |                                                                                                                                                                                                                                                                                                                                       |             |
| 31 |                                 |     |                                                                                                                                                                                                                                                                                                                                       |             |
| 32 | <b>Ethics and dissemination</b> |     |                                                                                                                                                                                                                                                                                                                                       |             |
| 33 |                                 |     |                                                                                                                                                                                                                                                                                                                                       |             |
| 34 | Research ethics approval        | 24  | Plans for seeking research ethics committee/institutional review board (REC/IRB) approval                                                                                                                                                                                                                                             | Page 14     |
| 35 |                                 |     |                                                                                                                                                                                                                                                                                                                                       |             |
| 36 |                                 |     |                                                                                                                                                                                                                                                                                                                                       |             |
| 37 | Protocol amendments             | 25  | Plans for communicating important protocol modifications (eg, changes to eligibility criteria, outcomes, analyses) to relevant parties (eg, investigators, REC/IRBs, trial participants, trial registries, journals, regulators)                                                                                                      | Page 14     |
| 38 |                                 |     |                                                                                                                                                                                                                                                                                                                                       |             |
| 39 |                                 |     |                                                                                                                                                                                                                                                                                                                                       |             |
| 40 |                                 |     |                                                                                                                                                                                                                                                                                                                                       |             |
| 41 |                                 |     |                                                                                                                                                                                                                                                                                                                                       |             |
| 42 |                                 |     |                                                                                                                                                                                                                                                                                                                                       |             |
| 43 |                                 |     |                                                                                                                                                                                                                                                                                                                                       |             |
| 44 |                                 |     |                                                                                                                                                                                                                                                                                                                                       |             |
| 45 |                                 |     |                                                                                                                                                                                                                                                                                                                                       |             |
| 46 |                                 |     |                                                                                                                                                                                                                                                                                                                                       |             |



|    |                               |     |                                                                                                                                                                                                                                                                                     |                |
|----|-------------------------------|-----|-------------------------------------------------------------------------------------------------------------------------------------------------------------------------------------------------------------------------------------------------------------------------------------|----------------|
| 1  | Consent or assent             | 26a | Who will obtain informed consent or assent from potential trial participants or authorised surrogates, and how (see Item 32)                                                                                                                                                        | Page 7 and 14  |
| 2  |                               |     |                                                                                                                                                                                                                                                                                     |                |
| 3  |                               |     |                                                                                                                                                                                                                                                                                     |                |
| 4  |                               | 26b | Additional consent provisions for collection and use of participant data and biological specimens in ancillary studies, if applicable                                                                                                                                               | _____          |
| 5  |                               |     |                                                                                                                                                                                                                                                                                     |                |
| 6  |                               |     |                                                                                                                                                                                                                                                                                     |                |
| 7  | Confidentiality               | 27  | How personal information about potential and enrolled participants will be collected, shared, and maintained in order to protect confidentiality before, during, and after the trial                                                                                                | Page 12 and 14 |
| 8  |                               |     |                                                                                                                                                                                                                                                                                     |                |
| 9  |                               |     |                                                                                                                                                                                                                                                                                     |                |
| 10 | Declaration of interests      | 28  | Financial and other competing interests for principal investigators for the overall trial and each study site                                                                                                                                                                       | Page 15        |
| 11 |                               |     |                                                                                                                                                                                                                                                                                     |                |
| 12 |                               |     |                                                                                                                                                                                                                                                                                     |                |
| 13 | Access to data                | 29  | Statement of who will have access to the final trial dataset, and disclosure of contractual agreements that limit such access for investigators                                                                                                                                     | Page 14        |
| 14 |                               |     |                                                                                                                                                                                                                                                                                     |                |
| 15 |                               |     |                                                                                                                                                                                                                                                                                     |                |
| 16 |                               |     |                                                                                                                                                                                                                                                                                     |                |
| 17 | Ancillary and post-trial care | 30  | Provisions, if any, for ancillary and post-trial care, and for compensation to those who suffer harm from trial participation                                                                                                                                                       | _____          |
| 18 |                               |     |                                                                                                                                                                                                                                                                                     |                |
| 19 |                               |     |                                                                                                                                                                                                                                                                                     |                |
| 20 | Dissemination policy          | 31a | Plans for investigators and sponsor to communicate trial results to participants, healthcare professionals, the public, and other relevant groups (eg, via publication, reporting in results databases, or other data sharing arrangements), including any publication restrictions | Page 15        |
| 21 |                               |     |                                                                                                                                                                                                                                                                                     |                |
| 22 |                               |     |                                                                                                                                                                                                                                                                                     |                |
| 23 |                               |     |                                                                                                                                                                                                                                                                                     |                |
| 24 |                               | 31b | Authorship eligibility guidelines and any intended use of professional writers                                                                                                                                                                                                      | _____          |
| 25 |                               |     |                                                                                                                                                                                                                                                                                     |                |
| 26 |                               | 31c | Plans, if any, for granting public access to the full protocol, participant-level dataset, and statistical code                                                                                                                                                                     | Page 14        |
| 27 |                               |     |                                                                                                                                                                                                                                                                                     |                |
| 28 |                               |     |                                                                                                                                                                                                                                                                                     |                |
| 29 | <b>Appendices</b>             |     |                                                                                                                                                                                                                                                                                     |                |
| 30 |                               |     |                                                                                                                                                                                                                                                                                     |                |
| 31 | Informed consent materials    | 32  | Model consent form and other related documentation given to participants and authorised surrogates                                                                                                                                                                                  | Page 7 and 14  |
| 32 |                               |     |                                                                                                                                                                                                                                                                                     |                |
| 33 |                               |     |                                                                                                                                                                                                                                                                                     |                |
| 34 | Biological specimens          | 33  | Plans for collection, laboratory evaluation, and storage of biological specimens for genetic or molecular analysis in the current trial and for future use in ancillary studies, if applicable                                                                                      | _____          |
| 35 |                               |     |                                                                                                                                                                                                                                                                                     |                |
| 36 |                               |     |                                                                                                                                                                                                                                                                                     |                |

\*It is strongly recommended that this checklist be read in conjunction with the SPIRIT 2013 Explanation & Elaboration for important clarification on the items. Amendments to the protocol should be tracked and dated. The SPIRIT checklist is copyrighted by the SPIRIT Group under the Creative Commons [“Attribution-NonCommercial-NoDerivs 3.0 Unported”](https://creativecommons.org/licenses/by-nc-nd/3.0/) license.
