# Supplementary material for: Efficacy of mecobalamin (vitamin B12) in the treatment of long-term pain in women diagnosed with fibromyalgia: protocol for a randomised, placebo-controlled trial
Source: PubMed Central journal article supplement (PMC10069488; doi:10.1136/bmjopen-2022-066987), 2023-03-30
Supplement: bmjopen-2022-066987.reviewer_comments.pdf [file bmjopen-2022-066987.reviewer_comments.pdf]

## PEER REVIEW HISTORY

BMJ Open publishes all reviews undertaken for accepted manuscripts. Reviewers are asked to complete a checklist review form (<http://bmjopen.bmj.com/site/about/resources/checklist.pdf>) and are provided with free text boxes to elaborate on their assessment. These free text comments are reproduced below.

### ARTICLE DETAILS

|                            |                                                                                                                                                                    |
|----------------------------|--------------------------------------------------------------------------------------------------------------------------------------------------------------------|
| <b>TITLE (PROVISIONAL)</b> | Efficacy of mecobalamin (vitamin B12) in the treatment of long-term pain in women diagnosed with fibromyalgia: protocol for a randomized, placebo-controlled trial |
| <b>AUTHORS</b>             | Sall Hansson, Karin; Lindqvist, Gunilla; Stening, Kent; Fohlman, Jan; Wojanowski, Anna; Ponten, Moa; Jensen, Karin; Gerdle, Björn; Elmqvist, Carina                |

### VERSION 1 – REVIEW

|                        |                                                             |
|------------------------|-------------------------------------------------------------|
| <b>REVIEWER</b>        | Adıgüzel, Kübra Tel<br>University of Health Sciences Turkey |
| <b>REVIEW RETURNED</b> | 06-Sep-2022                                                 |

|                         |                                                                                                                                                                                                                                                                                                                                                                                                                                                                                                                                                  |
|-------------------------|--------------------------------------------------------------------------------------------------------------------------------------------------------------------------------------------------------------------------------------------------------------------------------------------------------------------------------------------------------------------------------------------------------------------------------------------------------------------------------------------------------------------------------------------------|
| <b>GENERAL COMMENTS</b> | This is an interesting study and i think that the results will be valuable. Here, i have some minor questions.<br>1. How will you control or document dietary B12 intake? I recommend to obtain 24-hour dietary record weekly and compare dietary intake.<br>2. Is there a physical activity record in the study protocol? What if some of the included patients perform exercise or quit their routine exercise program?<br>3. In abstract section: do not use abbreviation for 'QST measured'. Because it is not repeated in abstract section. |
|-------------------------|--------------------------------------------------------------------------------------------------------------------------------------------------------------------------------------------------------------------------------------------------------------------------------------------------------------------------------------------------------------------------------------------------------------------------------------------------------------------------------------------------------------------------------------------------|

|                        |                                                                          |
|------------------------|--------------------------------------------------------------------------|
| <b>REVIEWER</b>        | Goni, Vijay<br>Post Graduate Institute of Medical Education and Research |
| <b>REVIEW RETURNED</b> | 05-Oct-2022                                                              |

|                         |                                                                                           |
|-------------------------|-------------------------------------------------------------------------------------------|
| <b>GENERAL COMMENTS</b> | It is a well constructed study protocol. This should be accepted and pursued as intended. |
|-------------------------|-------------------------------------------------------------------------------------------|

|                        |                                                                    |
|------------------------|--------------------------------------------------------------------|
| <b>REVIEWER</b>        | Ghavidel-Parsa, Banafsheh<br>Guilan University of Medical Sciences |
| <b>REVIEW RETURNED</b> | 04-Dec-2022                                                        |

|                         |                                                                                                                                                                                                                                                                                                                                                                                                                                                                                                                                                                                                                                                                                   |
|-------------------------|-----------------------------------------------------------------------------------------------------------------------------------------------------------------------------------------------------------------------------------------------------------------------------------------------------------------------------------------------------------------------------------------------------------------------------------------------------------------------------------------------------------------------------------------------------------------------------------------------------------------------------------------------------------------------------------|
| <b>GENERAL COMMENTS</b> | It is very interesting study protocol about the effect of B12 on pain in fibromyalgia patients. There are some important issues that help to achieve more real results:<br>1. Considering heterogeneous spectrum of fibromyalgia patients and variable response to treatment in fibromyalgia, it would be reasonable to incorporate some severity scales such as FIQR or PSD for subanalysis of data and categorization of patients into mild, moderate and severe impact.<br>2. The authors mentioned this study as the first trial of B12 on fibromyalgia. I refer you to the recent publication (2022) by Gharibpoor et al that investigated the effect of B12 on fibromyalgia |
|-------------------------|-----------------------------------------------------------------------------------------------------------------------------------------------------------------------------------------------------------------------------------------------------------------------------------------------------------------------------------------------------------------------------------------------------------------------------------------------------------------------------------------------------------------------------------------------------------------------------------------------------------------------------------------------------------------------------------|

|  |                                                                                                                                                                                                                                                                                                                                                                                                                                          |
|--|------------------------------------------------------------------------------------------------------------------------------------------------------------------------------------------------------------------------------------------------------------------------------------------------------------------------------------------------------------------------------------------------------------------------------------------|
|  | <p>patients as an pre-post study. Although this study was not the randomized-controlled trial, it showed the promising results about use of B12 in fibromyalgia patients.</p> <p>3.I did not see any study limitaions in the protocol. The low numbers of participants, heterogenesity of fibromyalgia spectrum, large placebo effects of parantral injection (despite controlled group), and so on can be the important limitaions.</p> |
|--|------------------------------------------------------------------------------------------------------------------------------------------------------------------------------------------------------------------------------------------------------------------------------------------------------------------------------------------------------------------------------------------------------------------------------------------|

**VERSION 1 – AUTHOR RESPONSE**

|                                                                                                                                                                                                                                                                                                                                              |                                                                                                                                                                                                                                                                                             |
|----------------------------------------------------------------------------------------------------------------------------------------------------------------------------------------------------------------------------------------------------------------------------------------------------------------------------------------------|---------------------------------------------------------------------------------------------------------------------------------------------------------------------------------------------------------------------------------------------------------------------------------------------|
| <b>Reviewer 1 comments</b>                                                                                                                                                                                                                                                                                                                   |                                                                                                                                                                                                                                                                                             |
| This is an interesting study and i think that the results will be valuable. Here, I have some minor questions.                                                                                                                                                                                                                               | Thank you                                                                                                                                                                                                                                                                                   |
| How will you control or document dietary B12 intake? I recommend to obtain 24-hour dietary record weekly and compare dietary intake.                                                                                                                                                                                                         | Thank you, it's a brilliant idea for future studies, however in this study we do not intend to control or document the dietary B12 intake. Oral intake would not lead to the high concentration needed to penetrate into CNS. However, we measure cobalamin/s three times during the study. |
| Is there a physical activity record in the study protocol? What if some of the included patients perform exercise or quit their routine exercise program?                                                                                                                                                                                    | We have no special physical activity record but questions about physical activity is recorded in RAND-36 three times during the study.                                                                                                                                                      |
| In abstract section: do not use abbreviation for 'QST measured'. Because it is not repeated in abstract section.                                                                                                                                                                                                                             | Thank you, the abbreviation is now deleted in the abstract                                                                                                                                                                                                                                  |
|                                                                                                                                                                                                                                                                                                                                              |                                                                                                                                                                                                                                                                                             |
| <b>Reviewer 2 comments</b>                                                                                                                                                                                                                                                                                                                   |                                                                                                                                                                                                                                                                                             |
| It is a well constructed study protocol. This should be accepted and pursued as intended.                                                                                                                                                                                                                                                    | Thank you                                                                                                                                                                                                                                                                                   |
|                                                                                                                                                                                                                                                                                                                                              |                                                                                                                                                                                                                                                                                             |
| <b>Reviewer 3 comments</b>                                                                                                                                                                                                                                                                                                                   |                                                                                                                                                                                                                                                                                             |
| It is very interesting study protocol about the effect of B12 on pain in fibromyalgia patients. There are some important issues that help to achieve more real results:                                                                                                                                                                      | Thank you                                                                                                                                                                                                                                                                                   |
| Considering heterogeneous spectrum of fibromyalgia patients and variable response to treatment in fibromyalgia, it would be reasonable to incorporate some severity scales such as FIQR or PSD for subanalysis of data and categorization of patients into mild, moderate and severe impact.                                                 | Thank you, In the start of the study, we decided to use RAND-36 Health and life quality, McGills questionnaire short form and Patients' Global Impression of change (PGIC). All these assessments measure the impact on the patients.                                                       |
| The authors mentioned this study as the first trial of B12 on fibromyalgia. I refer you to the recent publication (2022) by Gharibpoor et al that investigated the effect of B12 on fibromyalgia patients as a pre-post study. Although this study was not the randomized-controlled trial, it showed the promising results about use of B12 | Thank you for an interesting publication which now is included in the introduction of the manuscript.                                                                                                                                                                                       |

|                                                                                                                                                                                                                                                     |                                                                            |
|-----------------------------------------------------------------------------------------------------------------------------------------------------------------------------------------------------------------------------------------------------|----------------------------------------------------------------------------|
| in fibromyalgia patients.                                                                                                                                                                                                                           |                                                                            |
| I did not see any study limitations in the protocol. The low numbers of participants, heterogeneity of fibromyalgia spectrum, large placebo effects of parenteral injection (despite controlled group), and so on can be the important limitations. | Thank you, limitations are now included and clarified in the main document |

#### VERSION 2 – REVIEW

|                        |                                                             |
|------------------------|-------------------------------------------------------------|
| <b>REVIEWER</b>        | Adıgüzel, Kübra Tel<br>University of Health Sciences Turkey |
| <b>REVIEW RETURNED</b> | 05-Mar-2023                                                 |

|                         |                                         |
|-------------------------|-----------------------------------------|
| <b>GENERAL COMMENTS</b> | I reviewed the revisions. Best regards. |
|-------------------------|-----------------------------------------|

|                        |                                                                    |
|------------------------|--------------------------------------------------------------------|
| <b>REVIEWER</b>        | Ghavidel-Parsa, Banafsheh<br>Guilan University of Medical Sciences |
| <b>REVIEW RETURNED</b> | 06-Feb-2023                                                        |

|                         |                                |
|-------------------------|--------------------------------|
| <b>GENERAL COMMENTS</b> | Thank you for your corrections |
|-------------------------|--------------------------------|
